# Supplementary material
Source: PubMed Central journal article supplement (PMC10427731)
Supplement: NIHMS1894392-supplement-appendix.pdf [file NIHMS1894392-supplement-appendix.pdf]

APPENDIX

Data table

| State FIP | State         | State abb | Area    | Area title                                                | County FIP | Township code | County or township name | Number of home health aides | Number of nursing assistants | Census region | Over 65 populatio | Home health aide ratio | Nursing assistant ratio | Metropolit an area |
|-----------|---------------|-----------|---------|-----------------------------------------------------------|------------|---------------|-------------------------|-----------------------------|------------------------------|---------------|-------------------|------------------------|-------------------------|--------------------|
| 23        | Maine         | ME        | 76900   | Portsmouth, NH-ME                                         | 31         | 727           | Kittery town            | 610                         | 850                          | 1             | 101452            | 6                      | 8                       | 1                  |
| 44        | Rhode Island  | RI        | 76450   | Norwich-New London-Westerly, CT-RI                        | 9          | 36            | Westerly town           | 2280                        | 1130                         | 1             | 96827             | 24                     | 12                      | 1                  |
| 50        | Vermont       | VT        | 5000001 | Southern Vermont nonmetropolitan area                     | 1          | 107           | Leicester town          | 1340                        | 1130                         | 1             | 70674             | 19                     | 16                      | 0                  |
| 25        | Massachusetts | MA        | 77200   | Providence-Warwick, RI-MA                                 | 21         | 282           | Bellingham town         | 11570                       | 9450                         | 1             | 540692            | 21                     | 17                      | 1                  |
| 23        | Maine         | ME        | 2300002 | Southwest Maine nonmetropolitan area                      | 7          | 187           | Washington unorganized  | 4000                        | 2620                         | 1             | 213159            | 19                     | 12                      | 0                  |
| 25        | Massachusetts | MA        | 74500   | Leominster-Gardner, MA                                    | 27         | 8             | Phillipston town        | 2390                        | 690                          | 1             | 134009            | 18                     | 5                       | 1                  |
| 25        | Massachusetts | MA        | 76600   | Pittsfield, MA                                            | 15         | 354           | Middlefield town        | 1870                        | 650                          | 1             | 58729             | 32                     | 11                      | 1                  |
| 9         | Connecticut   | CT        | 73450   | Hartford-West Hartford-East Hartford, CT                  | 7          | 72            | Haddam town             | 14140                       | 7250                         | 1             | 323670            | 44                     | 22                      | 1                  |
| 23        | Maine         | ME        | 73050   | Dover-Durham, NH-ME                                       | 31         | 739           | South Berwick town      | 520                         | 500                          | 1             | 64092             | 8                      | 8                       | 1                  |
| 33        | New Hampshire | NH        | 3300006 | West Central-Southwest New Hampshire nonmetropolitan area | 9          | 522           | Lebanon city            | 1210                        | 1430                         | 1             | 154345            | 8                      | 9                       | 0                  |
| 25        | Massachusetts | MA        | 78100   | Springfield, MA-CT                                        | 11         | 200           | Shutesbury town         | 18180                       | 3790                         | 1             | 305904            | 59                     | 12                      | 1                  |
| 9         | Connecticut   | CT        | 72850   | Danbury, CT                                               | 1          | 9             | Bethel town             | 1170                        | 800                          | 1             | 193605            | 6                      | 4                       | 1                  |
| 50        | Vermont       | VT        | 72400   | Burlington-South Burlington, VT                           | 23         | 61            | Duxbury town            | 960                         | 900                          | 1             | 59194             | 16                     | 15                      | 1                  |
| 9         | Connecticut   | CT        | 71950   | Bridgeport-Stamford-Norwalk, CT                           | 9          | 2             | Ansonia city            | 8460                        | 4290                         | 1             | 306574            | 28                     | 14                      | 1                  |

| State FIP | State         | State abb | Area    | Area title                                  | County FIP | Township code | County or township name | Number of home health aides | Number of nursing assistants | Census region | Over 65 populatio | Home health aide ratio | Nursing assistant ratio | Metropolit an area |
|-----------|---------------|-----------|---------|---------------------------------------------|------------|---------------|-------------------------|-----------------------------|------------------------------|---------------|-------------------|------------------------|-------------------------|--------------------|
| 25        | Massachusetts | MA        | 71650   | Boston-Cambridge-Nashua, MA-NH              | 25         | 143           | Winthrop town           | 66430                       | 26580                        | 1             | 106580            | 62                     | 25                      | 1                  |
| 9         | Connecticut   | CT        | 79600   | Worcester, MA-CT                            | 15         | 145           | Plainfield town         | 10080                       | 4710                         | 1             | 234849            | 43                     | 20                      | 1                  |
| 25        | Massachusetts | MA        | 70900   | Barnstable Town, MA                         | 1          | 43            | Sandwich town           | 2530                        | 1290                         | 1             | 163850            | 15                     | 8                       | 1                  |
| 9         | Connecticut   | CT        | 75700   | New Haven, CT                               | 9          | 14            | Branford town           | 6650                        | 4130                         | 1             | 186698            | 36                     | 22                      | 1                  |
| 50        | Vermont       | VT        | 5000002 | Northern Vermont nonmetropolitan area       | 13         | 100           | Isle La Motte town      | 620                         | 560                          | 1             | 72502             | 9                      | 8                       | 0                  |
| 23        | Maine         | ME        | 76750   | Portland-South Portland, ME                 | 5          | 135           | Yarmouth town           | 5030                        | 2510                         | 1             | 119745            | 42                     | 21                      | 1                  |
| 23        | Maine         | ME        | 2300001 | Northeast Maine nonmetropolitan area        | 29         | 690           | Talmadge town           | 1760                        | 1300                         | 1             | 72106             | 24                     | 18                      | 0                  |
| 9         | Connecticut   | CT        | 78700   | Waterbury, CT                               | 5          | 216           | Woodbury town           | 2700                        | 870                          | 1             | 192277            | 14                     | 5                       | 1                  |
| 25        | Massachusetts | MA        | 75550   | New Bedford, MA                             | 23         | 312           | Mattapoissett town      | 3310                        | 960                          | 1             | 194747            | 17                     | 5                       | 1                  |
| 33        | Hampshire     | NH        | 74950   | Manchester, NH                              | 11         | 617           | Manchester city         | 1160                        | 1150                         | 1             | 153456            | 8                      | 7                       | 1                  |
| 23        | Maine         | ME        | 74650   | Lewiston-Auburn, ME                         | 1          | 4             | Leeds town              | 1740                        | 750                          | 1             | 57909             | 30                     | 13                      | 1                  |
| 33        | New Hampshire | NH        | 3300002 | Central New Hampshire nonmetropolitan area  | 13         | 726           | Webster town            | 2180                        | 1480                         | 1             | 191130            | 11                     | 8                       | 0                  |
| 33        | New Hampshire | NH        | 3300001 | Northern New Hampshire nonmetropolitan area | 3          | 208           | Freedom town            | 570                         | 400                          | 1             | 40994             | 14                     | 10                      | 0                  |
| 9         | Connecticut   | CT        | 900001  | Connecticut nonmetropolitan area            | 15         | 74            | Hampton town            | 960                         | 470                          | 1             | 59687             | 16                     | 8                       | 0                  |
| 25        | Massachusetts | MA        | 2500006 | Massachusetts nonmetropolitan area          | 7          | 314           | Oak Bluffs town         | 2340                        | 650                          | 1             | 281911            | 8                      | 2                       | 0                  |
| 23        | Maine         | ME        | 70750   | Bangor, ME                                  | 21         | 495           | Orneville unorganized   | 1760                        | 1060                         | 1             | 56857             | 31                     | 19                      | 1                  |

| State FIP | State        | State abb | Area    | Area title                                                                            | County FIP | Township code | County or township name          | Number of home health aides | Number of nursing assistants | Census region | Over 65 populatio | Home health aide ratio | Nursing assistant ratio | Metropolit an area |
|-----------|--------------|-----------|---------|---------------------------------------------------------------------------------------|------------|---------------|----------------------------------|-----------------------------|------------------------------|---------------|-------------------|------------------------|-------------------------|--------------------|
| 42        | Pennsylvania | PA        | 48700   | Williamsport, PA Capital/Northern New York nonmetropolitan area                       | 81         | 0             | Lycoming County                  | 1480                        | 740                          | 2             | 22461             | 66                     | 33                      | 1                  |
| 36        | New York     | NY        | 3600001 | Binghamton, NY Watertown-Fort Drum, NY                                                | 41         | 0             | Hamilton County                  | 5420                        | 1440                         | 2             | 77722470          | 70                     | 19                      | 0                  |
| 36        | New York     | NY        | 13780   | Altoona, PA Southwest New York nonmetropolitan area                                   | 107        | 0             | Tioga County Jefferson County    | 2290                        | 1560                         | 2             | 74156             | 49                     | 33                      | 1                  |
| 36        | New York     | NY        | 48060   | Central East New York nonmetropolitan area                                            | 45         | 0             | Blair County                     | 830                         | 430                          | 2             | 11259             | 53                     | 28                      | 1                  |
| 42        | Pennsylvania | PA        | 11020   | Allentown-Bethlehem-Easton, PA-NJ Chambersburg-Waynesboro, PA                         | 13         | 0             | Steuben County                   | 2090                        | 1060                         | 2             | 35986             | 81                     | 41                      | 1                  |
| 36        | New York     | NY        | 3600004 | Rochester, NY                                                                         | 101        | 0             | Otsego County                    | 4370                        | 1800                         | 2             | 33969             | 44                     | 18                      | 0                  |
| 36        | New York     | NY        | 3600006 | Reading, PA Bloomsburg-Berwick, PA Vineland-Bridgeton, NJ Albany-Schenectady-Troy, NY | 77         | 0             | Northampton County               | 6800                        | 1640                         | 2             | 30156             | 70                     | 17                      | 0                  |
| 42        | Pennsylvania | PA        | 10900   | Ocean City, NJ New York-Newark-Jersey City, NY-NJ-PA                                  | 95         | 0             | Franklin County                  | 8960                        | 4800                         | 2             | 465311            | 57                     | 31                      | 1                  |
| 42        | Pennsylvania | PA        | 16540   |                                                                                       | 55         | 0             | Monroe County                    | 990                         | 680                          | 2             | 69196             | 32                     | 22                      | 1                  |
| 36        | New York     | NY        | 40380   |                                                                                       | 55         | 0             | Berks County Columbia County     | 15210                       | 5080                         | 2             | 954741            | 77                     | 26                      | 1                  |
| 42        | Pennsylvania | PA        | 39740   |                                                                                       | 11         | 0             | Cumberland County                | 5040                        | 1950                         | 2             | 19169             | 68                     | 26                      | 1                  |
| 42        | Pennsylvania | PA        | 14100   |                                                                                       | 37         | 0             | Schoharie County Cape May County | 720                         | 860                          | 2             | 55233             | 42                     | 51                      | 1                  |
| 34        | New Jersey   | NJ        | 47220   |                                                                                       | 11         | 0             | Passaic County                   | 1330                        | 690                          | 2             | 9257              | 57                     | 29                      | 1                  |
| 36        | New York     | NY        | 10580   |                                                                                       | 95         | 0             |                                  | 10740                       | 4050                         | 2             | 158299            | 68                     | 26                      | 1                  |
| 34        | New Jersey   | NJ        | 36140   |                                                                                       | 9          | 0             |                                  | 820                         | 360                          | 2             | 25166             | 33                     | 14                      | 1                  |
| 34        | New Jersey   | NJ        | 35620   |                                                                                       | 31         | 0             |                                  | 450830                      | 81890                        | 2             | 5104              | 140                    | 25                      | 1                  |

| State FIP | State        | State abb | Area    | Area title                                  | County FIP | Township code | County or township name | Number of home health aides | Number of nursing assistants | Census region | Over 65 populatio | Home health aide ratio | Nursing assistant ratio | Metropolit an area |
|-----------|--------------|-----------|---------|---------------------------------------------|------------|---------------|-------------------------|-----------------------------|------------------------------|---------------|-------------------|------------------------|-------------------------|--------------------|
| 36        | New York     | NY        | 46540   | Utica-Rome, NY                              | 43         | 0             | Herkimer County         | 7020                        | 1520                         | 2             | 56861             | 123                    | 27                      | 1                  |
| 42        | Pennsylvania | PA        | 30140   | Lebanon, PA                                 | 75         | 0             | Lebanon County          | 880                         | 690                          | 2             | 28173             | 31                     | 24                      | 1                  |
| 42        | Pennsylvania | PA        | 29540   | Lancaster, PA                               | 71         | 0             | Lancaster County        | 5620                        | 3220                         | 2             | 100381            | 56                     | 32                      | 1                  |
| 34        | New Jersey   | NJ        | 45940   | Trenton, NJ                                 | 21         | 0             | Mercer County           | 3540                        | 1830                         | 2             | 57487             | 62                     | 32                      | 1                  |
| 42        | Pennsylvania | PA        | 38300   | Pittsburgh, PA                              | 19         | 0             | Butler County           | 31750                       | 12260                        | 2             | 475336            | 67                     | 26                      | 1                  |
| 36        | New York     | NY        | 15380   | Buffalo-Cheektowaga-Niagara Falls, NY       | 63         | 0             | Niagara County          | 13230                       | 4860                         | 2             | 209795            | 63                     | 23                      | 1                  |
| 42        | Pennsylvania | PA        | 42540   | Scranton--Wilkes-Barre--Hazleton, PA        | 79         | 0             | Luzerne County          | 7900                        | 2910                         | 2             | 112461            | 70                     | 26                      | 1                  |
| 36        | New York     | NY        | 28740   | Kingston, NY                                | 111        | 0             | Ulster County           | 1310                        | 400                          | 2             | 36183             | 36                     | 11                      | 1                  |
| 42        | Pennsylvania | PA        | 4200001 | Western Pennsylvania nonmetropolitan area   | 53         | 0             | Forest County           | 5710                        | 1690                         | 2             | 91432             | 62                     | 18                      | 0                  |
| 36        | New York     | NY        | 45060   | Syracuse, NY                                | 75         | 0             | Oswego County           | 6300                        | 3130                         | 2             | 113828            | 55                     | 27                      | 1                  |
| 42        | Pennsylvania | PA        | 37980   | Philadelphia-Camden-Wilmington, PA-NJ-DE-MD | 101        | 0             | Philadelphia County     | 103990                      | 31280                        | 2             | 100176            | 104                    | 31                      | 1                  |
| 42        | Pennsylvania | PA        | 20700   | East Stroudsburg, PA                        | 89         | 0             | Monroe County           | 1250                        | 370                          | 2             | 30347             | 41                     | 12                      | 1                  |
| 36        | New York     | NY        | 21300   | Elmira, NY                                  | 15         | 0             | Chemung County          | 670                         | 450                          | 2             | 16284             | 41                     | 28                      | 1                  |
| 42        | Pennsylvania | PA        | 21500   | Erie, PA                                    | 49         | 0             | Erie County             | 6360                        | 1690                         | 2             | 50250             | 127                    | 34                      | 1                  |
| 42        | Pennsylvania | PA        | 27780   | Johnstown, PA                               | 21         | 0             | Cambria County          | 1750                        | 610                          | 2             | 30242             | 58                     | 20                      | 1                  |
| 42        | Pennsylvania | PA        | 44300   | State College, PA                           | 27         | 0             | Centre County           | 1030                        | 500                          | 2             | 24134             | 43                     | 21                      | 1                  |
| 36        | New York     | NY        | 27060   | Ithaca, NY                                  | 109        | 0             | Tompkins County         | 570                         | 380                          | 2             | 15430             | 37                     | 25                      | 1                  |
| 42        | Pennsylvania | PA        | 23900   | Gettysburg, PA                              | 1          | 0             | Adams County            | 570                         | 380                          | 2             | 21730             | 26                     | 17                      | 1                  |

| State FIP | State        | State abb | Area    | Area title                                  | County FIP | Township code | County or township name | Number of home health aides | Number of nursing assistants | Census region | Over 65 populatio | Home health aide ratio | Nursing assistant ratio | Metropolit an area |
|-----------|--------------|-----------|---------|---------------------------------------------|------------|---------------|-------------------------|-----------------------------|------------------------------|---------------|-------------------|------------------------|-------------------------|--------------------|
| 36        | New York     | NY        | 24020   | Glens Falls, NY                             | 113        | 0             | Warren County           | 1150                        | 600                          | 2             | 269               | 43                     | 22                      | 1                  |
| 34        | New Jersey   | NJ        | 12100   | Atlantic City-Hammonton, NJ                 | 1          | 0             | Atlantic County         | 2220                        | 1580                         | 2             | 490               | 45                     | 32                      | 1                  |
| 42        | Pennsylvania | PA        | 49660   | Youngstown-Warren-Boardman, OH-PA           | 85         | 0             | Mercer County           | 4790                        | 2590                         | 2             | 117               | 41                     | 22                      | 1                  |
| 42        | Pennsylvania | PA        | 49620   | York-Hanover, PA                            | 133        | 0             | York County             | 3220                        | 1790                         | 2             | 806               | 40                     | 22                      | 1                  |
| 42        | Pennsylvania | PA        | 4200002 | Northern Pennsylvania nonmetropolitan area  | 105        | 0             | Potter County           | 4010                        | 1940                         | 2             | 100               | 40                     | 19                      | 0                  |
| 42        | Pennsylvania | PA        | 25420   | Harrisburg-Carlisle, PA                     | 41         | 0             | Cumberland County       | 8780                        | 3800                         | 2             | 104               | 84                     | 36                      | 1                  |
| 42        | Pennsylvania | PA        | 4200003 | Southern Pennsylvania nonmetropolitan area  | 57         | 0             | Fulton County           | 5790                        | 2250                         | 2             | 121               | 48                     | 19                      | 0                  |
| 18        | Indiana      | IN        | 26900   | Indianapolis-Carmel-Anderson, IN            | 57         | 0             | Hamilton County         | 12990                       | 9590                         | 3             | 291               | 45                     | 33                      | 1                  |
| 26        | Michigan     | MI        | 43780   | South Bend-Mishawaka, IN-MI                 | 27         | 0             | Cass County             | 1720                        | 1640                         | 3             | 551               | 31                     | 30                      | 1                  |
| 26        | Michigan     | MI        | 27100   | Jackson, MI                                 | 75         | 0             | Jackson County          | 1160                        | 580                          | 3             | 289               | 40                     | 20                      | 1                  |
| 39        | Ohio         | OH        | 3900001 | West Northwestern Ohio nonmetropolitan area | 91         | 0             | Logan County            | 2910                        | 2380                         | 3             | 111               | 26                     | 21                      | 0                  |
| 55        | Wisconsin    | WI        | 27500   | Janesville-Beloit, WI                       | 105        | 0             | Rock County             | 1220                        | 680                          | 3             | 278               | 44                     | 24                      | 1                  |
| 26        | Michigan     | MI        | 28020   | Kalamazoo-Portage, MI                       | 77         | 0             | Kalamazoo County        | 3070                        | 960                          | 3             | 550               | 56                     | 17                      | 1                  |
| 17        | Illinois     | IL        | 28100   | Kankakee, IL                                | 91         | 0             | Kankakee County         | 530                         | 690                          | 3             | 190               | 28                     | 36                      | 1                  |
| 55        | Wisconsin    | WI        | 43100   | Sheboygan, WI                               | 117        | 0             | Sheboygan County        | 1360                        | 550                          | 3             | 213               | 64                     | 26                      | 1                  |
| 17        | Illinois     | IL        | 1700004 | South Illinois nonmetropolitan area         | 55         | 0             | Franklin County         | 1700                        | 1230                         | 3             | 593               | 29                     | 21                      | 0                  |

| State FIP | State     | State abb | Area    | Area title                                                   | County FIP | Township code | County or township name | Number of home health aides | Number of nursing assistants | Census region | Over 65 populatio | Home health aide ratio | Nursing assistant ratio | Metropolit an area |
|-----------|-----------|-----------|---------|--------------------------------------------------------------|------------|---------------|-------------------------|-----------------------------|------------------------------|---------------|-------------------|------------------------|-------------------------|--------------------|
| 18        | Indiana   | IN        | 29020   | Kokomo, IN Lafayette-West                                    | 67         | 0             | Howard County           | 540                         | 430                          | 3             | 164               | 33                     | 26                      | 1                  |
| 18        | Indiana   | IN        | 29200   | Lafayette, IN Lansing-East                                   | 15         | 0             | Carroll County          | 1320                        | 940                          | 3             | 289               | 46                     | 33                      | 1                  |
| 26        | Michigan  | MI        | 29620   | Lansing, MI Western Wisconsin nonmetropolitan area           | 37         | 0             | Clinton County          | 3040                        | 1380                         | 3             | 755               | 40                     | 18                      | 1                  |
| 55        | Wisconsin | WI        | 5500004 | Dunn County                                                  | 33         | 0             | Dunn County             | 3480                        | 2060                         | 3             | 705               | 49                     | 29                      | 0                  |
| 39        | Ohio      | OH        | 30620   | Lima, OH                                                     | 3          | 0             | Allen County            | 730                         | 670                          | 3             | 185               | 39                     | 36                      | 1                  |
| 39        | Ohio      | OH        | 10420   | Akron, OH Northern Indiana nonmetropolitan area              | 133        | 0             | Portage County          | 5340                        | 3380                         | 3             | 127               | 42                     | 26                      | 1                  |
| 18        | Indiana   | IN        | 1800001 | Louisville/Jefferson County, KY-IN                           | 169        | 0             | Wabash County           | 1870                        | 2330                         | 3             | 976               | 19                     | 24                      | 0                  |
| 18        | Indiana   | IN        | 31140   | Bloomington, IN South Central Wisconsin nonmetropolitan area | 19         | 0             | Clark County            | 7410                        | 6620                         | 3             | 213               | 35                     | 31                      | 1                  |
| 18        | Indiana   | IN        | 14020   | Dodge County                                                 | 105        | 0             | Monroe County           | 1330                        | 680                          | 3             | 242               | 55                     | 28                      | 1                  |
| 55        | Wisconsin | WI        | 5500003 | McLean County                                                | 27         | 0             | Dodge County            | 4930                        | 2910                         | 3             | 103               | 47                     | 28                      | 0                  |
| 17        | Illinois  | IL        | 14010   | Bloomington, IL                                              | 113        | 0             | McLean County           | 750                         | 710                          | 3             | 267               | 28                     | 27                      | 1                  |
| 55        | Wisconsin | WI        | 31540   | Madison, WI                                                  | 49         | 0             | Iowa County             | 6590                        | 3350                         | 3             | 100               | 66                     | 33                      | 1                  |
| 39        | Ohio      | OH        | 31900   | Mansfield, OH Michigan City-La Porte, IN                     | 139        | 0             | Richland County         | 520                         | 490                          | 3             | 078               | 22                     | 20                      | 1                  |
| 18        | Indiana   | IN        | 33140   | Midland, MI                                                  | 91         | 0             | La Porte County         | 690                         | 370                          | 3             | 239               | 34                     | 18                      | 1                  |
| 26        | Michigan  | MI        | 33220   | Midland, MI Milwaukee-Waukesha-West Allis, WI                | 111        | 0             | Midland County          | 2370                        |                              | 3             | 203               | 151                    |                         | 1                  |
| 55        | Wisconsin | WI        | 33340   | Washington County                                            | 131        | 0             | Washington County       | 30690                       | 9210                         | 3             | 253               | 121                    | 36                      | 1                  |
| 18        | Indiana   | IN        | 1800002 | Warren County                                                | 171        | 0             | Warren County           | 2080                        | 2060                         | 3             | 872               | 24                     | 24                      | 0                  |

| State FIP | State     | State abb | Area    | Area title                                                 | County FIP | Township code | County or township name | Number of home health aides | Number of nursing assistants | Census region | Over 65 populatio | Home health aide ratio | Nursing assistant ratio | Metropolit an area |
|-----------|-----------|-----------|---------|------------------------------------------------------------|------------|---------------|-------------------------|-----------------------------|------------------------------|---------------|-------------------|------------------------|-------------------------|--------------------|
| 55        | Wisconsin | WI        | 5500001 | Northwestern Wisconsin nonmetropolitan area                | 107        | 0             | Rusk County             | 1040                        | 620                          | 3             | 33500             | 31                     | 19                      | 0                  |
| 26        | Michigan  | MI        | 13020   | Bay City, MI                                               | 17         | 0             | Bay County              | 1040                        | 380                          | 3             | 21642             | 48                     | 18                      | 1                  |
| 26        | Michigan  | MI        | 12980   | Battle Creek, MI                                           | 25         | 0             | Calhoun County          | 1170                        | 730                          | 3             | 24434             | 48                     | 30                      | 1                  |
| 26        | Michigan  | MI        | 33780   | Monroe, MI                                                 | 115        | 0             | Monroe County           | 740                         | 330                          | 3             | 2828              | 26                     | 12                      | 1                  |
| 18        | Indiana   | IN        | 1800003 | Southern Indiana nonmetropolitan area                      | 55         | 0             | Greene County           | 1760                        | 2020                         | 3             | 84555             | 21                     | 24                      | 0                  |
| 26        | Michigan  | MI        | 11460   | Ann Arbor, MI                                              | 161        | 0             | Washtenaw County        | 2720                        | 3190                         | 3             | 53369             | 51                     | 60                      | 1                  |
| 18        | Indiana   | IN        | 34620   | Muncie, IN                                                 | 35         | 0             | Delaware County         | 600                         | 670                          | 3             | 19927             | 30                     | 34                      | 1                  |
| 55        | Wisconsin | WI        | 39540   | Racine, WI                                                 | 101        | 0             | Racine County           | 2680                        | 750                          | 3             | 33642             | 80                     | 22                      | 1                  |
| 26        | Michigan  | MI        | 2600001 | Upper Peninsula of Michigan nonmetropolitan area           | 33         | 0             | Chippewa County         | 1840                        | 1370                         | 3             | 68255             | 27                     | 20                      | 0                  |
| 55        | Wisconsin | WI        | 24580   | Green Bay, WI                                              | 83         | 0             | Oconto County           | 3480                        | 1740                         | 3             | 52998             | 66                     | 33                      | 1                  |
| 26        | Michigan  | MI        | 24340   | Grand Rapids-Wyoming, MI                                   | 15         | 0             | Barry County            | 7440                        | 5580                         | 3             | 161337            | 46                     | 35                      | 1                  |
| 17        | Illinois  | IL        | 44100   | Springfield, IL                                            | 129        | 0             | Menard County           | 1140                        | 1110                         | 3             | 38275             | 30                     | 29                      | 1                  |
| 26        | Michigan  | MI        | 2600002 | Northeast Lower Peninsula of Michigan nonmetropolitan area | 7          | 0             | Alpena County           | 1610                        | 770                          | 3             | 75335             | 21                     | 10                      | 0                  |
| 18        | Indiana   | IN        | 23060   | Fort Wayne, IN                                             | 3          | 0             | Allen County            | 2970                        | 2590                         | 3             | 68152             | 44                     | 38                      | 1                  |
| 26        | Michigan  | MI        | 2600003 | Northwest Lower Peninsula of Michigan nonmetropolitan area | 9          | 0             | Antrim County           | 1830                        | 1380                         | 3             | 71871             | 25                     | 19                      | 0                  |

| State FIP | State     | State abb | Area    | Area title                                                   | County FIP | Township code | County or township name | Number of home health aides | Number of nursing assistants | Census region | Over 65 populatio | Home health aide ratio | Nursing assistant ratio | Metropolit an area |
|-----------|-----------|-----------|---------|--------------------------------------------------------------|------------|---------------|-------------------------|-----------------------------|------------------------------|---------------|-------------------|------------------------|-------------------------|--------------------|
| 55        | Wisconsin | WI        | 22540   | Fond du Lac, WI                                              | 39         | 0             | Fond du Lac County      | 910                         | 450                          | 3             | 196               | 46                     | 23                      | 1                  |
| 26        | Michigan  | MI        | 22420   | Flint, MI                                                    | 49         | 0             | Genesee County          | 3410                        | 1350                         | 3             | 729               | 47                     | 19                      | 1                  |
| 26        | Michigan  | MI        | 2600004 | Balance of Lower Peninsula of Michigan nonmetropolitan area  | 157        | 0             | Tuscola County          | 5860                        | 2920                         | 3             | 174               | 34                     | 17                      | 0                  |
| 39        | Ohio      | OH        | 44220   | Springfield, OH                                              | 23         | 0             | Clark County            | 680                         | 550                          | 3             | 264               | 26                     | 21                      | 1                  |
| 18        | Indiana   | IN        | 21140   | Elkhart-Goshen, IN                                           | 39         | 0             | Elkhart County          | 690                         | 850                          | 3             | 312               | 22                     | 27                      | 1                  |
| 55        | Wisconsin | WI        | 20740   | Eau Claire, WI                                               | 35         | 0             | Eau Claire County       | 2140                        | 930                          | 3             | 10                | 74                     | 32                      | 1                  |
| 17        | Illinois  | IL        | 1700003 | East Central Illinois nonmetropolitan area                   | 41         | 0             | Douglas County          | 2250                        | 1250                         | 3             | 594               | 38                     | 21                      | 0                  |
| 39        | Ohio      | OH        | 3900002 | North Northeastern Ohio nonmetropolitan area (noncontiguous) | 75         | 0             | Holmes County           | 4900                        | 4000                         | 3             | 174               | 28                     | 23                      | 0                  |
| 55        | Wisconsin | WI        | 20260   | Duluth, MN-WI                                                | 31         | 0             | Douglas County          | 5380                        | 1780                         | 3             | 544               | 99                     | 33                      | 1                  |
| 26        | Michigan  | MI        | 19820   | Detroit-Warren-Dearborn, MI                                  | 87         | 0             | Lapeer County           | 36780                       | 16990                        | 3             | 728               | 51                     | 23                      | 1                  |
| 18        | Indiana   | IN        | 45460   | Terre Haute, IN                                              | 21         | 0             | Clay County             | 790                         | 750                          | 3             | 296               | 27                     | 25                      | 1                  |
| 39        | Ohio      | OH        | 45780   | Toledo, OH                                                   | 95         | 0             | Lucas County            | 4330                        | 2940                         | 3             | 998               | 43                     | 29                      | 1                  |
| 17        | Illinois  | IL        | 19500   | Decatur, IL                                                  | 115        | 0             | Macon County            | 620                         | 570                          | 3             | 211               | 29                     | 27                      | 1                  |
| 39        | Ohio      | OH        | 19380   | Dayton, OH                                                   | 57         | 0             | Greene County           | 6620                        | 4150                         | 3             | 147               | 45                     | 28                      | 1                  |
| 17        | Illinois  | IL        | 19340   | Davenport-Moline-Rock Island, IA-IL                          | 131        | 0             | Mercer County           | 2440                        | 2030                         | 3             | 705               | 35                     | 29                      | 1                  |
| 17        | Illinois  | IL        | 19180   | Danville, IL                                                 | 183        | 0             | Vermilion County        | 130                         | 340                          | 3             | 150               | 9                      | 23                      | 1                  |
| 17        | Illinois  | IL        | 1700002 | West Central Illinois                                        | 17         | 0             | Cass County             | 2390                        | 2930                         | 3             | 100               | 24                     | 29                      | 0                  |



| State FIP | State     | State abb | Area    | Area title                                                      | County FIP | Township code | County or township name | Number of home health aides | Number of nursing assistants | Census region | Over 65 populatio | Home health aide ratio | Nursing assistant ratio | Metropolit an area |
|-----------|-----------|-----------|---------|-----------------------------------------------------------------|------------|---------------|-------------------------|-----------------------------|------------------------------|---------------|-------------------|------------------------|-------------------------|--------------------|
| 17        | Illinois  | IL        | 1700001 | nonmetropolitan area<br>Northwest Illinois nonmetropolitan area | 99         | 0             | La Salle County         | 1240                        | 1690                         | 3             | 782<br>64         | 16                     | 22                      | 0                  |
| 39        | Ohio      | OH        | 3900003 | Eastern Ohio nonmetropolitan area                               | 67         | 0             | Harrison County         | 2470                        | 1950                         | 3             | 758<br>91         | 33                     | 26                      | 0                  |
| 39        | Ohio      | OH        | 18140   | Columbus, OH                                                    | 49         | 0             | Franklin County         | 23560                       | 9730                         | 3             | 289<br>571        | 81                     | 34                      | 1                  |
| 18        | Indiana   | IN        | 18020   | Columbus, IN                                                    | 5          | 0             | Bartholomew County      | 590                         | 260                          | 3             | 138<br>51         | 43                     | 19                      | 1                  |
| 39        | Ohio      | OH        | 3900004 | Southern Ohio nonmetropolitan area                              | 163        | 0             | Vinton County           | 3810                        | 2320                         | 3             | 856<br>08         | 45                     | 27                      | 0                  |
| 39        | Ohio      | OH        | 17460   | Cleveland-Elyria, OH                                            | 103        | 0             | Medina County           | 17620                       | 12470                        | 3             | 388<br>760        | 45                     | 32                      | 1                  |
| 39        | Ohio      | OH        | 15940   | Canton-Massillon, OH                                            | 151        | 0             | Stark County            | 3830                        | 2340                         | 3             | 796<br>91         | 48                     | 29                      | 1                  |
| 17        | Illinois  | IL        | 16980   | Chicago-Naperville-Elgin, IL-IN-WI                              | 111        | 0             | McHenry County          | 84930                       | 39130                        | 3             | 142<br>423        | 60                     | 27                      | 1                  |
| 17        | Illinois  | IL        | 16580   | Champaign-Urbana, IL                                            | 147        | 0             | Piatt County            | 1020                        | 980                          | 3             | 335<br>63         | 30                     | 29                      | 1                  |
| 55        | Wisconsin | WI        | 48140   | Wausau, WI                                                      | 73         | 0             | Marathon County         | 1230                        | 520                          | 3             | 246<br>82         | 50                     | 21                      | 1                  |
| 17        | Illinois  | IL        | 16060   | Carbondale-Marion, IL                                           | 77         | 0             | Jackson County          | 1020                        | 720                          | 3             | 222<br>02         | 46                     | 32                      | 1                  |
| 26        | Michigan  | MI        | 34740   | Muskegon, MI                                                    | 121        | 0             | Muskegon County         | 1260                        | 670                          | 3             | 305<br>61         | 41                     | 22                      | 1                  |
| 55        | Wisconsin | WI        | 5500002 | Northeastern Wisconsin nonmetropolitan area                     | 141        | 0             | Wood County             | 4020                        | 1990                         | 3             | 108<br>722        | 37                     | 18                      | 0                  |
| 55        | Wisconsin | WI        | 11540   | Appleton, WI                                                    | 15         | 0             | Calumet County          | 2450                        | 870                          | 3             | 365<br>24         | 67                     | 24                      | 1                  |
| 26        | Michigan  | MI        | 35660   | Niles-Benton Harbor, MI                                         | 21         | 0             | Berrien County          | 760                         | 580                          | 3             | 311<br>22         | 24                     | 19                      | 1                  |
| 26        | Michigan  | MI        | 40980   | Saginaw, MI                                                     | 145        | 0             | Saginaw County          | 1530                        | 1270                         | 3             | 374<br>14         | 41                     | 34                      | 1                  |
| 17        | Illinois  | IL        | 40420   | Rockford, IL                                                    | 201        | 0             | Winnebago County        | 2220                        | 1650                         | 3             | 594<br>59         | 37                     | 28                      | 1                  |

| State FIP | State        | State abb | Area    | Area title                              | County FIP | Township code | County or township name | Number of home health aides | Number of nursing assistants | Census region | Over 65 populatio | Home health aide ratio | Nursing assistant ratio | Metropolit an area |
|-----------|--------------|-----------|---------|-----------------------------------------|------------|---------------|-------------------------|-----------------------------|------------------------------|---------------|-------------------|------------------------|-------------------------|--------------------|
| 55        | Wisconsin    | WI        | 36780   | Oshkosh-Neenah, WI                      | 139        | 0             | Winnebago County        | 1880                        | 750                          | 3             | 28908             | 65                     | 26                      | 1                  |
| 17        | Illinois     | IL        | 37900   | Peoria, IL                              | 203        | 0             | Woodford County         | 1410                        | 2690                         | 3             | 68034             | 21                     | 40                      | 1                  |
| 46        | South Dakota | SD        | 39660   | Rapid City, SD                          | 103        | 0             | Pennington County       | 500                         | 910                          | 4             | 28454             | 18                     | 32                      | 1                  |
| 19        | Iowa         | IA        | 1900001 | Northeast Iowa nonmetropolitan area     | 191        | 0             | Winneshiek County       | 1780                        | 2030                         | 4             | 53620             | 33                     | 38                      | 0                  |
| 27        | Minnesota    | MN        | 40340   | Rochester, MN                           | 45         | 0             | Fillmore County         | 4250                        | 1500                         | 4             | 37758             | 113                    | 40                      | 1                  |
| 27        | Minnesota    | MN        | 41060   | St. Cloud, MN                           | 145        | 0             | Stearns County          | 2870                        | 1450                         | 4             | 30780             | 93                     | 47                      | 1                  |
| 29        | Missouri     | MO        | 41140   | St. Joseph, MO-KS                       | 63         | 0             | DeKalb County           | 1750                        | 410                          | 4             | 21615             | 81                     | 19                      | 1                  |
| 29        | Missouri     | MO        | 41180   | St. Louis, MO-IL                        | 113        | 0             | Lincoln County          | 34590                       | 14090                        | 4             | 478728            | 72                     | 29                      | 1                  |
| 38        | North Dakota | ND        | 13900   | Bismarck, ND                            | 15         | 0             | Burleigh County         | 1120                        | 2180                         | 4             | 21981             | 51                     | 99                      | 1                  |
| 19        | Iowa         | IA        | 43580   | Sioux City, IA-NE-SD                    | 193        | 0             | Woodbury County         | 1010                        | 1170                         | 4             | 27438             | 37                     | 43                      | 1                  |
| 46        | South Dakota | SD        | 43620   | Sioux Falls, SD                         | 99         | 0             | Minnehaha County        | 1180                        | 2600                         | 4             | 37075             | 32                     | 70                      | 1                  |
| 29        | Missouri     | MO        | 44180   | Springfield, MO                         | 167        | 0             | Polk County             | 4760                        | 3060                         | 4             | 78936             | 60                     | 39                      | 1                  |
| 20        | Kansas       | KS        | 45820   | Topeka, KS                              | 87         | 0             | Jefferson County        | 2740                        | 2090                         | 4             | 44197             | 62                     | 47                      | 1                  |
| 19        | Iowa         | IA        | 47940   | Waterloo-Cedar Falls, IA                | 75         | 0             | Grundy County           | 1500                        | 1320                         | 4             | 29815             | 50                     | 44                      | 1                  |
| 29        | Missouri     | MO        | 2900003 | Southeast Missouri nonmetropolitan area | 203        | 0             | Shannon County          | 5890                        | 2960                         | 4             | 98486             | 60                     | 30                      | 0                  |
| 20        | Kansas       | KS        | 48620   | Wichita, KS                             | 95         | 0             | Kingman County          | 5310                        | 4620                         | 4             | 100282            | 53                     | 46                      | 1                  |
| 29        | Missouri     | MO        | 2900002 | North Missouri nonmetropolitan area     | 175        | 0             | Randolph County         | 2670                        | 1880                         | 4             | 64875             | 41                     | 29                      | 0                  |
| 19        | Iowa         | IA        | 1900003 | Southwest Iowa nonmetropolitan area     | 173        | 0             | Taylor County           | 1750                        | 1670                         | 4             | 45059             | 39                     | 37                      | 0                  |

| State FIP | State     | State abb | Area    | Area title                              | County FIP | Township code | County or township name | Number of home health aides | Number of nursing assistants | Census region | Over 65 populatio | Home health aide ratio | Nursing assistant ratio | Metropolit an area |
|-----------|-----------|-----------|---------|-----------------------------------------|------------|---------------|-------------------------|-----------------------------|------------------------------|---------------|-------------------|------------------------|-------------------------|--------------------|
| 19        | Iowa      | IA        | 1900004 | Southeast Iowa nonmetropolitan area     | 179        | 0             | Wapello County          | 3450                        | 3470                         | 4             | 101670            | 34                     | 34                      | 0                  |
| 31        | Nebraska  | NE        | 36540   | Omaha-Council Bluffs, NE-IA             | 153        | 0             | Sarpy County            | 5630                        | 6450                         | 4             | 134512            | 42                     | 48                      | 1                  |
| 19        | Iowa      | IA        | 11180   | Ames, IA                                | 169        | 0             | Story County            | 540                         | 420                          | 4             | 69                | 44                     | 34                      | 1                  |
| 27        | Minnesota | MN        | 33460   | Minneapolis-St. Paul-Bloomington, MN-WI | 37         | 0             | Dakota County           | 75830                       | 13160                        | 4             | 528990            | 143                    | 25                      | 1                  |
| 27        | Minnesota | MN        | 31860   | Mankato-North Mankato, MN               | 103        | 0             | Nicollet County         | 1870                        | 610                          | 4             | 15350             | 122                    | 40                      | 1                  |
| 20        | Kansas    | KS        | 31740   | Manhattan, KS                           | 149        | 0             | Pottawatomie County     | 550                         | 470                          | 4             | 10847             | 51                     | 43                      | 1                  |
| 31        | Nebraska  | NE        | 30700   | Lincoln, NE                             | 159        | 0             | Seward County           | 2150                        | 2290                         | 4             | 48871             | 44                     | 47                      | 1                  |
| 20        | Kansas    | KS        | 29940   | Lawrence, KS                            | 45         | 0             | Douglas County          | 630                         | 490                          | 4             | 15678             | 40                     | 31                      | 1                  |
| 27        | Minnesota | MN        | 29100   | La Crosse-Onalaska, WI-MN               | 55         | 0             | Houston County          | 1560                        | 1160                         | 4             | 24034             | 65                     | 48                      | 1                  |
| 20        | Kansas    | KS        | 2000006 | Kansas nonmetropolitan area             | 187        | 0             | Stanton County          | 6460                        | 7920                         | 4             | 171268            | 38                     | 46                      | 0                  |
| 20        | Kansas    | KS        | 28140   | Kansas City, MO-KS                      | 107        | 0             | Linn County             | 17780                       | 11830                        | 4             | 329126            | 54                     | 36                      | 1                  |
| 29        | Missouri  | MO        | 27900   | Joplin, MO                              | 97         | 0             | Jasper County           | 2110                        | 910                          | 4             | 30107             | 70                     | 30                      | 1                  |
| 29        | Missouri  | MO        | 27620   | Jefferson City, MO                      | 51         | 0             | Cole County             | 980                         | 1010                         | 4             | 25794             | 38                     | 39                      | 1                  |
| 19        | Iowa      | IA        | 26980   | Iowa City, IA                           | 103        | 0             | Johnson County          | 1450                        | 1300                         | 4             | 22949             | 63                     | 57                      | 1                  |
| 31        | Nebraska  | NE        | 24260   | Grand Island, NE                        | 93         | 0             | Howard County           | 370                         | 600                          | 4             | 14170             | 26                     | 42                      | 1                  |
| 27        | Minnesota | MN        | 24220   | Grand Forks, ND-MN                      | 119        | 0             | Polk County             | 1030                        | 1100                         | 4             | 15023             | 69                     | 73                      | 1                  |
| 29        | Missouri  | MO        | 22220   | Fayetteville-Springdale-Rogers, AR-MO   | 119        | 0             | McDonald County         | 2670                        | 2390                         | 4             | 73593             | 36                     | 32                      | 1                  |
| 27        | Minnesota | MN        | 22020   | Fargo, ND-MN                            | 27         | 0             | Clay County             | 2840                        | 2320                         | 4             | 31260             | 91                     | 74                      | 1                  |
| 19        | Iowa      | IA        | 20220   | Dubuque, IA                             | 61         | 0             | Dubuque County          | 960                         | 960                          | 4             | 17819             | 54                     | 54                      | 1                  |

| State FIP | State        | State abb | Area    | Area title                               | County FIP | Township code | County or township name | Number of home health aides | Number of nursing assistants | Census region | Over 65 populatio | Home health aide ratio | Nursing assistant ratio | Metropolit an area |   |
|-----------|--------------|-----------|---------|------------------------------------------|------------|---------------|-------------------------|-----------------------------|------------------------------|---------------|-------------------|------------------------|-------------------------|--------------------|---|
| 27        | Minnesota    | MN        | 2700001 | Northwest Minnesota nonmetropolitan area | 167        | 0             | Wilkin County           | 5930                        | 2770                         | 4             | 104               | 57                     | 27                      | 0                  |   |
| 19        | Iowa         | IA        | 19780   | Des Moines-West Des Moines, IA           | 49         | 0             | Dallas County           | 5120                        | 3880                         | 4             | 909               | 56                     | 43                      | 1                  |   |
| 27        | Minnesota    | MN        | 2700002 | Northeast Minnesota nonmetropolitan area | 75         | 0             | Lake County             | 1670                        | 480                          | 4             | 337               | 49                     | 14                      | 0                  |   |
| 27        | Minnesota    | MN        | 2700003 | Southwest Minnesota nonmetropolitan area | 23         | 0             | Chippewa County         | 5850                        | 1800                         | 4             | 561               | 104                    | 32                      | 0                  |   |
| 29        | Missouri     | MO        | 17860   | Columbia, MO                             | 19         | 0             | Boone County            | 1600                        | 1410                         | 4             | 230               | 84                     | 61                      | 1                  |   |
| 27        | Minnesota    | MN        | 2700004 | Central Minnesota nonmetropolitan area   | 91         | 0             | Martin County           | 4460                        | 1940                         | 4             | 687               | 18                     | 65                      | 28                 | 0 |
| 29        | Missouri     | MO        | 2900001 | Central Missouri nonmetropolitan area    | 185        | 0             | St. Clair County        | 4240                        | 2150                         | 4             | 958               | 81                     | 44                      | 22                 | 0 |
| 29        | Missouri     | MO        | 2900004 | Southwest Missouri nonmetropolitan area  | 57         | 0             | Dade County             | 1390                        | 690                          | 4             | 488               | 35                     | 28                      | 14                 | 0 |
| 38        | North Dakota | ND        | 3800007 | East North Dakota nonmetropolitan area   | 63         | 0             | Nelson County           | 1350                        | 1340                         | 4             | 314               | 18                     | 43                      | 43                 | 0 |
| 38        | North Dakota | ND        | 3800006 | West North Dakota nonmetropolitan area   | 1          | 0             | Adams County            | 1340                        | 1330                         | 4             | 345               | 25                     | 39                      | 39                 | 0 |
| 31        | Nebraska     | NE        | 3100001 | Northwest Nebraska nonmetropolitan area  | 17         | 0             | Brown County            | 520                         | 960                          | 4             | 223               | 21                     | 23                      | 43                 | 0 |
| 31        | Nebraska     | NE        | 3100003 | Northeast Nebraska nonmetropolitan area  | 53         | 0             | Dodge County            | 1200                        | 1770                         | 4             | 392               | 86                     | 31                      | 45                 | 0 |

| State FIP | State          | State abb | Area    | Area title                             | County FIP | Township code | County or township name | Number of home health aides | Number of nursing assistants | Census region | Over 65 populatio | Home health aide ratio | Nursing assistant ratio | Metropolit an area |
|-----------|----------------|-----------|---------|----------------------------------------|------------|---------------|-------------------------|-----------------------------|------------------------------|---------------|-------------------|------------------------|-------------------------|--------------------|
| 46        | South Dakota   | SD        | 4600003 | West South Dakota nonmetropolitan area | 41         | 0             | Dewey County            | 600                         | 900                          | 4             | 30318             | 20                     | 30                      | 0                  |
| 46        | South Dakota   | SD        | 4600002 | East South Dakota nonmetropolitan area | 39         | 0             | Deuel County            | 940                         | 2100                         | 4             | 53062             | 18                     | 40                      | 0                  |
| 31        | Nebraska       | NE        | 3100006 | South Nebraska nonmetropolitan area    | 75         | 0             | Grant County            | 1870                        | 2870                         | 4             | 71723             | 26                     | 40                      | 0                  |
| 29        | Missouri       | MO        | 16020   | Cape Girardeau, MO-IL                  | 31         | 0             | Cape Girardeau County   | 1260                        | 770                          | 4             | 17391             | 72                     | 44                      | 1                  |
| 19        | Iowa           | IA        | 16300   | Cedar Rapids, IA                       | 105        | 0             | Jones County            | 2100                        | 1500                         | 4             | 46113             | 46                     | 33                      | 1                  |
| 19        | Iowa           | IA        | 1900002 | Northwest Iowa nonmetropolitan area    | 91         | 0             | Humboldt County         | 1670                        | 2370                         | 4             | 60856             | 27                     | 39                      | 0                  |
| 45        | South Carolina | SC        | 16740   | Charlotte-Concord-Gastonia, NC-SC      | 91         | 0             | York County             | 12860                       | 10440                        | 5             | 363574            | 35                     | 29                      | 1                  |
| 51        | Virginia       | VA        | 16820   | Charlottesville, VA                    | 29         | 0             | Buckingham County       | 1710                        | 1650                         | 5             | 43745             | 39                     | 38                      | 1                  |
| 13        | Georgia        | GA        | 16860   | Chattanooga, TN-GA                     | 83         | 0             | Dade County             | 2280                        | 2030                         | 5             | 103707            | 22                     | 20                      | 1                  |
| 12        | Florida        | FL        | 1200003 | South Florida nonmetropolitan area     | 43         | 0             | Glades County           | 310                         | 550                          | 5             | 48950             | 6                      | 11                      | 0                  |
| 12        | Florida        | FL        | 1200006 | North Florida nonmetropolitan area     | 47         | 0             | Hamilton County         | 1270                        | 1720                         | 5             | 100204            | 13                     | 17                      | 0                  |
| 13        | Georgia        | GA        | 1300001 | North Georgia nonmetropolitan area     | 147        | 0             | Hart County             | 820                         | 1540                         | 5             | 113859            | 7                      | 14                      | 0                  |
| 13        | Georgia        | GA        | 1300002 | Middle Georgia nonmetropolitan area    | 261        | 0             | Sumter County           | 1880                        | 1830                         | 5             | 66889             | 28                     | 27                      | 0                  |
| 13        | Georgia        | GA        | 1300003 | East Georgia nonmetropolitan area      | 317        | 0             | Wilkes County           | 1070                        | 1170                         | 5             | 48226             | 22                     | 24                      | 0                  |
| 13        | Georgia        | GA        | 1300004 | South Georgia nonmetropolitan area     | 1          | 0             | Appling County          | 1410                        | 2480                         | 5             | 99641             | 14                     | 25                      | 0                  |

| State FIP | State          | State abb | Area    | Area title                                            | County FIP | Township code | County or township name | Number of home health aides | Number of nursing assistants | Census region | Over 65 populatio | Home health aide ratio | Nursing assistant ratio | Metropolit an area |
|-----------|----------------|-----------|---------|-------------------------------------------------------|------------|---------------|-------------------------|-----------------------------|------------------------------|---------------|-------------------|------------------------|-------------------------|--------------------|
| 54        | West Virginia  | WV        | 5400002 | Northern West Virginia nonmetropolitan area           | 103        | 0             | Wetzel County           | 3820                        | 1460                         | 5             | 92506             | 41                     | 16                      | 0                  |
| 24        | Maryland       | MD        | 2400006 | Maryland nonmetropolitan area                         | 41         | 0             | Talbot County           | 490                         | 630                          | 5             | 35671             | 14                     | 18                      | 0                  |
| 37        | North Carolina | NC        | 3700001 | Southeast Coastal North Carolina nonmetropolitan area | 85         | 0             | Harnett County          | 5440                        | 4490                         | 5             | 146111            | 37                     | 31                      | 0                  |
| 37        | North Carolina | NC        | 3700002 | Northeast Coastal North Carolina nonmetropolitan area | 177        | 0             | Tyrrell County          | 2030                        | 1430                         | 5             | 64729             | 31                     | 22                      | 0                  |
| 37        | North Carolina | NC        | 3700003 | Piedmont North Carolina nonmetropolitan area          | 193        | 0             | Wilkes County           | 3980                        | 5120                         | 5             | 153097            | 26                     | 33                      | 0                  |
| 37        | North Carolina | NC        | 3700004 | Mountain North Carolina nonmetropolitan area          | 99         | 0             | Jackson County          | 2030                        | 1700                         | 5             | 95421             | 21                     | 18                      | 0                  |
| 54        | West Virginia  | WV        | 5400001 | Southern West Virginia nonmetropolitan area           | 55         | 0             | Mercer County           | 1650                        | 920                          | 5             | 57567             | 29                     | 16                      | 0                  |
| 45        | South Carolina | SC        | 17900   | Columbia, SC                                          | 55         | 0             | Kershaw County          | 6300                        | 3040                         | 5             | 128396            | 49                     | 24                      | 1                  |
| 13        | Georgia        | GA        | 17980   | Columbus, GA-AL                                       | 53         | 0             | Chattahoochee County    | 1160                        | 850                          | 5             | 44549             | 26                     | 19                      | 1                  |
| 12        | Florida        | FL        | 18880   | Crestview-Fort Walton Beach-Destin, FL                | 131        | 0             | Walton County           | 650                         | 680                          | 5             | 49353             | 13                     | 14                      | 1                  |
| 24        | Maryland       | MD        | 19060   | Cumberland, MD-WV                                     | 1          | 0             | Allegany County         | 750                         | 640                          | 5             | 20422             | 37                     | 31                      | 1                  |
| 51        | Virginia       | VA        | 5100004 | Northwest Virginia nonmetropolitan area               | 91         | 0             | Highland County         | 1450                        | 700                          | 5             | 48495             | 30                     | 14                      | 0                  |
| 13        | Georgia        | GA        | 19140   | Dalton, GA                                            | 313        | 0             | Whitfield County        | 230                         | 310                          | 5             | 21182             | 11                     | 15                      | 1                  |

| State FIP | State          | State abb | Area    | Area title                              | County FIP | Township code | County or township name | Number of home health aides | Number of nursing assistants | Census region | Over 65 populatio | Home health aide ratio | Nursing assistant ratio | Metropolit an area |
|-----------|----------------|-----------|---------|-----------------------------------------|------------|---------------|-------------------------|-----------------------------|------------------------------|---------------|-------------------|------------------------|-------------------------|--------------------|
| 12        | Florida        | FL        | 19660   | Deltona-Daytona Beach-Ormond Beach, FL  | 35         | 0             | Flagler County          | 1400                        | 2770                         | 5             | 173<br>707<br>316 | 8                      | 16                      | 1                  |
| 10        | Delaware       | DE        | 20100   | Dover, DE                               | 1          | 0             | Kent County             |                             | 670                          | 5             | 23<br>919         |                        | 21                      | 1                  |
| 37        | North Carolina | NC        | 20500   | Durham-Chapel Hill, NC                  | 63         | 0             | Durham County           | 2630                        | 4740                         | 5             | 90                | 29                     | 52                      | 1                  |
| 51        | Virginia       | VA        | 5100003 | Northeast Virginia nonmetropolitan area | 99         | 0             | King George County      | 910                         | 610                          | 5             | 373<br>02<br>467  | 24                     | 16                      | 0                  |
| 37        | North Carolina | NC        | 22180   | Fayetteville, NC                        | 93         | 0             | Hoke County             | 1760                        | 1830                         | 5             | 91                | 38                     | 39                      | 1                  |
| 45        | South Carolina | SC        | 22500   | Florence, SC                            | 31         | 0             | Darlington County       | 1600                        | 980                          | 5             | 370<br>53         | 43                     | 26                      | 1                  |
| 51        | Virginia       | VA        | 5100002 | Southside Virginia nonmetropolitan area | 37         | 0             | Charlotte County        | 3720                        | 1690                         | 5             | 665<br>42<br>431  | 56                     | 25                      | 0                  |
| 12        | Florida        | FL        | 23540   | Gainesville, FL                         | 1          | 0             | Alachua County          | 1230                        | 2250                         | 5             | 10<br>314         | 29                     | 52                      | 1                  |
| 13        | Georgia        | GA        | 23580   | Gainesville, GA                         | 139        | 0             | Hall County             | 900                         | 620                          | 5             | 89<br>208         | 29                     | 20                      | 1                  |
| 37        | North Carolina | NC        | 24140   | Goldsboro, NC                           | 191        | 0             | Wayne County            | 670                         | 1390                         | 5             | 02<br>128         | 32                     | 67                      | 1                  |
| 37        | North Carolina | NC        | 24660   | Greensboro-High Point, NC               | 81         | 0             | Guilford County         | 4680                        | 3880                         | 5             | 498<br>250        | 36                     | 30                      | 1                  |
| 37        | North Carolina | NC        | 24780   | Greenville, NC                          | 147        | 0             | Pitt County             | 1260                        | 1700                         | 5             | 45                | 50                     | 68                      | 1                  |
| 45        | South Carolina | SC        | 24860   | Greenville-Anderson-Mauldin, SC         | 77         | 0             | Pickens County          | 6220                        | 3020                         | 5             | 155<br>588        | 40                     | 19                      | 1                  |
| 51        | Virginia       | VA        | 5100001 | Southwest Virginia nonmetropolitan area | 27         | 0             | Buchanan County         | 3620                        | 1460                         | 5             | 833<br>39         | 43                     | 18                      | 0                  |
| 54        | West Virginia  | WV        | 25180   | Hagerstown-Martinsburg, MD-WV           | 3          | 0             | Berkeley County         | 1830                        | 1070                         | 5             | 443<br>64<br>211  | 41                     | 24                      | 1                  |
| 51        | Virginia       | VA        | 25500   | Harrisonburg, VA                        | 165        | 0             | Rockingham County       | 580                         | 720                          | 5             | 47<br>723         | 27                     | 34                      | 1                  |
| 37        | North Carolina | NC        | 25860   | Hickory-Lenoir-Morganton, NC            | 3          | 0             | Alexander County        | 2300                        | 2840                         | 5             | 12                | 32                     | 39                      | 1                  |

| State FIP | State          | State abb | Area  | Area title                                    | County FIP | Township code | County or township name | Number of home health aides | Number of nursing assistants | Census region | Over 65 populatio | Home health aide ratio | Nursing assistant ratio | Metropolit an area |
|-----------|----------------|-----------|-------|-----------------------------------------------|------------|---------------|-------------------------|-----------------------------|------------------------------|---------------|-------------------|------------------------|-------------------------|--------------------|
| 45        | South Carolina | SC        | 25940 | Hilton Head Island-Bluffton-Beaufort, SC      | 53         | 0             | Jasper County           | 1220                        | 580                          | 5             | 59860             | 20                     | 10                      | 1                  |
| 13        | Georgia        | GA        | 25980 | Hinesville, GA                                | 179        | 0             | Liberty County          | 80                          |                              | 5             | 7895              | 10                     |                         | 1                  |
| 12        | Florida        | FL        | 26140 | Homosassa Springs, FL                         | 17         | 0             | Citrus County           | 610                         | 640                          | 5             | 54938             | 11                     | 12                      | 1                  |
| 54        | West Virginia  | WV        | 26580 | Huntington-Ashland, WV-KY-OH                  | 11         | 0             | Cabell County           | 3510                        | 1590                         | 5             | 69356             | 51                     | 23                      | 1                  |
| 12        | Florida        | FL        | 27260 | Jacksonville, FL                              | 89         | 0             | Nassau County           | 5100                        | 6700                         | 5             | 253440            | 20                     | 26                      | 1                  |
| 37        | North Carolina | NC        | 27340 | Jacksonville, NC                              | 133        | 0             | Onslow County           | 330                         | 360                          | 5             | 19026             | 17                     | 19                      | 1                  |
| 51        | Virginia       | VA        | 28700 | Kingsport-Bristol-Bristol, TN-VA              | 520        | 0             | Bristol city            | 1140                        | 1380                         | 5             | 69188             | 16                     | 20                      | 1                  |
| 12        | Florida        | FL        | 29460 | Lakeland-Winter Haven, FL                     | 105        | 0             | Polk County             | 1680                        | 2250                         | 5             | 148168            | 11                     | 15                      | 1                  |
| 13        | Georgia        | GA        | 10500 | Albany, GA                                    | 95         | 0             | Dougherty County        | 830                         | 690                          | 5             | 24869             | 33                     | 28                      | 1                  |
| 51        | Virginia       | VA        | 31340 | Lynchburg, VA                                 | 680        | 0             | Lynchburg city          | 2140                        | 1120                         | 5             | 50496             | 42                     | 22                      | 1                  |
| 13        | Georgia        | GA        | 31420 | Macon, GA                                     | 79         | 0             | Crawford County         | 1090                        | 1140                         | 5             | 39360             | 28                     | 29                      | 1                  |
| 12        | Florida        | FL        | 33100 | Miami-Fort Lauderdale-West Palm Beach, FL     | 99         | 0             | Palm Beach County       | 18160                       | 22390                        | 5             | 115174            | 16                     | 19                      | 1                  |
| 54        | West Virginia  | WV        | 34060 | Morgantown, WV                                | 77         | 0             | Preston County          | 730                         | 800                          | 5             | 20945             | 35                     | 38                      | 1                  |
| 37        | North Carolina | NC        | 34820 | Myrtle Beach-Conway-North Myrtle Beach, SC-NC | 19         | 0             | Brunswick County        | 1770                        | 1080                         | 5             | 135414            | 13                     | 8                       | 1                  |
| 12        | Florida        | FL        | 34940 | Naples-Immokalee-Marco Island, FL             | 21         | 0             | Collier County          | 1260                        | 1580                         | 5             | 126707            | 10                     | 12                      | 1                  |
| 37        | North Carolina | NC        | 35100 | New Bern, NC                                  | 137        | 0             | Pamlico County          | 860                         | 660                          | 5             | 2626              | 33                     | 25                      | 1                  |
| 12        | Florida        | FL        | 35840 | North Port-Sarasota-Bradenton, FL             | 115        | 0             | Sarasota County         | 3420                        | 3550                         | 5             | 275105            | 12                     | 13                      | 1                  |



| State FIP | State          | State abb | Area  | Area title                         | County FIP | Township code | County or township name | Number of home health aides | Number of nursing assistants | Census region | Over 65 populatio | Home health aide ratio | Nursing assistant ratio | Metropolit an area |
|-----------|----------------|-----------|-------|------------------------------------|------------|---------------|-------------------------|-----------------------------|------------------------------|---------------|-------------------|------------------------|-------------------------|--------------------|
| 12        | Florida        | FL        | 36100 | Ocala, FL                          | 83         | 0             | Marion County           | 950                         | 1260                         | 5             | 106<br>675        | 9                      | 12                      | 1                  |
| 37        | North Carolina | NC        | 11700 | Asheville, NC                      | 21         | 0             | Buncombe County         | 2650                        | 3050                         | 5             | 105<br>061        | 25                     | 29                      | 1                  |
| 13        | Georgia        | GA        | 12020 | Athens-Clarke County, GA           | 219        | 0             | Oconee County           | 850                         | 630                          | 5             | 290<br>31         | 29                     | 22                      | 1                  |
| 12        | Florida        | FL        | 36740 | Orlando-Kissimmee-Sanford, FL      | 117        | 0             | Seminole County         | 7320                        | 8550                         | 5             | 397<br>125        | 18                     | 22                      | 1                  |
| 12        | Florida        | FL        | 37340 | Palm Bay-Melbourne- Titusville, FL | 9          | 0             | Brevard County          | 2110                        | 2510                         | 5             | 145<br>752        | 14                     | 17                      | 1                  |
| 12        | Florida        | FL        | 37460 | Panama City, FL                    | 45         | 0             | Gulf County             | 340                         | 590                          | 5             | 49<br>186         | 9                      | 16                      | 1                  |
| 54        | West Virginia  | WV        | 37620 | Parkersburg-Vienna, WV             | 105        | 0             | Wirt County             | 1280                        | 370                          | 5             | 77<br>846         | 69                     | 20                      | 1                  |
| 12        | Florida        | FL        | 37860 | Pensacola-Ferry Pass-Brent, FL     | 33         | 0             | Escambia County         | 1310                        | 1990                         | 5             | 92<br>761         | 15                     | 23                      | 1                  |
| 13        | Georgia        | GA        | 12060 | Atlanta-Sandy Springs-Roswell, GA  | 171        | 0             | Lamar County            | 19640                       | 19050                        | 5             | 534<br>131        | 26                     | 25                      | 1                  |
| 12        | Florida        | FL        | 38940 | Port St. Lucie, FL                 | 111        | 0             | St. Lucie County        | 1610                        | 1840                         | 5             | 688<br>770        | 12                     | 14                      | 1                  |
| 12        | Florida        | FL        | 39460 | Punta Gorda, FL                    | 15         | 0             | Charlotte County        | 520                         | 800                          | 5             | 72<br>174         | 7                      | 10                      | 1                  |
| 37        | North Carolina | NC        | 39580 | Raleigh, NC                        | 69         | 0             | Franklin County         | 5880                        | 5360                         | 5             | 357<br>999        | 34                     | 31                      | 1                  |
| 13        | Georgia        | GA        | 12260 | Augusta-Richmond County, GA-SC     | 189        | 0             | McDuffie County         | 3420                        | 2160                         | 5             | 26<br>211         | 34                     | 22                      | 1                  |
| 51        | Virginia       | VA        | 40060 | Richmond, VA                       | 87         | 0             | Henrico County          | 9390                        | 6450                         | 5             | 275<br>646        | 44                     | 31                      | 1                  |
| 51        | Virginia       | VA        | 40220 | Roanoke, VA                        | 161        | 0             | Roanoke County          | 1970                        | 2530                         | 5             | 59<br>284         | 30                     | 39                      | 1                  |
| 37        | North Carolina | NC        | 40580 | Rocky Mount, NC                    | 127        | 0             | Nash County             | 930                         | 730                          | 5             | 65<br>167         | 33                     | 26                      | 1                  |
| 13        | Georgia        | GA        | 40660 | Rome, GA                           | 115        | 0             | Floyd County            | 350                         | 910                          | 5             | 79<br>103         | 21                     | 54                      | 1                  |
| 24        | Maryland       | MD        | 41540 | Salisbury, MD-DE                   | 47         | 0             | Worcester County        | 2640                        | 1880                         | 5             | 453               | 26                     | 18                      | 1                  |

| State FIP | State          | State abb | Area  | Area title                            | County FIP | Township code | County or township name | Number of home health aides | Number of nursing assistants | Census region | Over 65 populatio | Home health aide ratio | Nursing assistant ratio | Metropolit an area |
|-----------|----------------|-----------|-------|---------------------------------------|------------|---------------|-------------------------|-----------------------------|------------------------------|---------------|-------------------|------------------------|-------------------------|--------------------|
| 24        | Maryland       | MD        | 12580 | Baltimore-Columbia-Towson, MD         | 510        | 0             | Baltimore city          | 15190                       | 13900                        | 5             | 446041247         | 34                     | 31                      | 1                  |
| 54        | West Virginia  | WV        | 13220 | Beckley, WV                           | 19         | 0             | Fayette County          | 1490                        | 450                          | 5             | 77                | 60                     | 18                      | 1                  |
| 51        | Virginia       | VA        | 13980 | Blacksburg-Christiansburg-Radford, VA | 71         | 0             | Giles County            | 900                         | 700                          | 5             | 30163253          | 30                     | 23                      | 1                  |
| 13        | Georgia        | GA        | 15260 | Brunswick, GA                         | 191        | 0             | McIntosh County         | 370                         | 560                          | 5             | 27                | 15                     | 22                      | 1                  |
| 13        | Georgia        | GA        | 42340 | Savannah, GA                          | 103        | 0             | Effingham County        | 1540                        | 1440                         | 5             | 58061             | 27                     | 25                      | 1                  |
| 12        | Florida        | FL        | 42680 | Sebastian-Vero Beach, FL              | 61         | 0             | Indian River County     | 510                         | 850                          | 5             | 54133             | 9                      | 16                      | 1                  |
| 12        | Florida        | FL        | 42700 | Sebring, FL                           | 55         | 0             | Highlands County        | 270                         | 480                          | 5             | 38289             | 7                      | 13                      | 1                  |
| 45        | South Carolina | SC        | 43900 | Spartanburg, SC                       | 83         | 0             | Spartanburg County      | 2820                        | 1180                         | 5             | 58119             | 49                     | 20                      | 1                  |
| 51        | Virginia       | VA        | 44420 | Staunton-Waynesboro, VA               | 15         | 0             | Augusta County          | 980                         | 640                          | 5             | 25917             | 38                     | 25                      | 1                  |
| 45        | South Carolina | SC        | 44940 | Sumter, SC                            | 85         | 0             | Sumter County           | 760                         | 310                          | 5             | 17988             | 42                     | 17                      | 1                  |
| 12        | Florida        | FL        | 45220 | Tallahassee, FL                       | 129        | 0             | Wakulla County          | 1410                        | 1400                         | 5             | 58203             | 24                     | 24                      | 1                  |
| 12        | Florida        | FL        | 45300 | Tampa-St. Petersburg-Clearwater, FL   | 57         | 0             | Hillsborough County     | 10730                       | 13240                        | 5             | 770640            | 17                     | 21                      | 1                  |
| 12        | Florida        | FL        | 45540 | The Villages, FL                      | 119        | 0             | Sumter County           | 340                         | 550                          | 5             | 19934             | 4                      | 7                       | 1                  |
| 13        | Georgia        | GA        | 46660 | Valdosta, GA                          | 27         | 0             | Brooks County           | 490                         | 620                          | 5             | 02                | 25                     | 31                      | 1                  |
| 45        | South Carolina | SC        | 16700 | Charleston-North Charleston, SC       | 15         | 0             | Berkeley County         | 2440                        | 2290                         | 5             | 125746            | 19                     | 18                      | 1                  |
| 54        | West Virginia  | WV        | 16620 | Charleston, WV                        | 15         | 0             | Clay County             | 2370                        | 980                          | 5             | 44029             | 54                     | 22                      | 1                  |
| 12        | Florida        | FL        | 15980 | Cape Coral-Fort Myers, FL             | 71         | 0             | Lee County              | 2240                        | 2890                         | 5             | 224632            | 10                     | 13                      | 1                  |
| 24        | Maryland       | MD        | 15680 | California-Lexington Park, MD         | 37         | 0             | St. Mary's County       | 90                          | 340                          | 5             | 15196             | 6                      | 22                      | 1                  |
| 37        | North Carolina | NC        | 15500 | Burlington, NC                        | 1          | 0             | Alamance County         | 1070                        | 790                          | 5             | 29035             | 37                     | 27                      | 1                  |

| State FIP | State                | State abb | Area    | Area title                                         | County FIP | Township code | County or township name | Number of home health aides | Number of nursing assistants | Census region | Over 65 populatio | Home health aide ratio | Nursing assistant ratio | Metropolit an area |
|-----------|----------------------|-----------|---------|----------------------------------------------------|------------|---------------|-------------------------|-----------------------------|------------------------------|---------------|-------------------|------------------------|-------------------------|--------------------|
| 45        | South Carolina       | SC        | 4500002 | Upper Savannah South Carolina nonmetropolitan area | 21         | 0             | Cherokee County         | 670                         | 690                          | 5             | 507               | 13                     | 14                      | 0                  |
| 45        | South Carolina       | SC        | 4500004 | Lower Savannah South Carolina nonmetropolitan area | 75         | 0             | Orangeburg County       | 1130                        | 630                          | 5             | 342               | 33                     | 18                      | 0                  |
| 45        | South Carolina       | SC        | 4500006 | Northeast South Carolina nonmetropolitan area      | 29         | 0             | Colleton County         | 2490                        | 920                          | 5             | 725               | 34                     | 13                      | 0                  |
| 37        | North Carolina       | NC        | 49180   | Winston-Salem, NC                                  | 59         | 0             | Davie County            | 3640                        | 3930                         | 5             | 120               | 30                     | 33                      | 1                  |
| 51        | Virginia             | VA        | 49020   | Winchester, VA-WV                                  | 69         | 0             | Frederick County        | 960                         | 710                          | 5             | 259               | 37                     | 27                      | 1                  |
| 37        | North Carolina       | NC        | 48900   | Wilmington, NC                                     | 141        | 0             | Pender County           | 2060                        | 1670                         | 5             | 548               | 38                     | 30                      | 1                  |
| 54        | West Virginia        | WV        | 48540   | Wheeling, WV-OH                                    | 69         | 0             | Ohio County             | 1050                        | 810                          | 5             | 305               | 34                     | 27                      | 1                  |
| 54        | West Virginia        | WV        | 48260   | Weirton-Steubenville, WV-OH                        | 9          | 0             | Brooke County           | 670                         | 550                          | 5             | 266               | 25                     | 21                      | 1                  |
| 11        | District of Columbia | DC        | 47900   | Washington-Arlington-Alexandria, DC-VA-MD-WV       | 1          | 0             | District of Columbia    | 35250                       | 21990                        | 5             | 844               | 42                     | 26                      | 1                  |
| 13        | Georgia              | GA        | 47580   | Warner Robins, GA                                  | 153        | 0             | Houston County          | 510                         | 650                          | 5             | 275               | 18                     | 24                      | 1                  |
| 37        | North Carolina       | NC        | 47260   | Virginia Beach-Norfolk-Newport News, VA-NC         | 53         | 0             | Currituck County        | 10260                       | 7160                         | 5             | 261               | 39                     | 27                      | 1                  |
| 47        | Tennessee            | TN        | 34980   | Nashville--Davidson--Murfreesboro--Franklin, TN    | 15         | 0             | Cannon County           | 7140                        | 7490                         | 6             | 267               | 27                     | 28                      | 1                  |
| 1         | Alabama              | AL        | 11500   | Anniston-Oxford-Jacksonville, AL                   | 15         | 0             | Calhoun County          | 450                         | 460                          | 6             | 205               | 22                     | 22                      | 1                  |
| 47        | Tennessee            | TN        | 34100   | Morristown, TN                                     | 63         | 0             | Hamblen County          | 700                         | 340                          | 6             | 231               | 30                     | 15                      | 1                  |
| 1         | Alabama              | AL        | 33860   | Montgomery, AL                                     | 1          | 0             | Autauga County          | 1310                        | 1490                         | 6             | 587               | 22                     | 25                      | 1                  |

| State FIP | State       | State abb | Area    | Area title                                   | County FIP | Township code | County or township name | Number of home health aides | Number of nursing assistants | Census region | Over 65 populatio | Home health aide ratio | Nursing assistant ratio | Metropolit an area |
|-----------|-------------|-----------|---------|----------------------------------------------|------------|---------------|-------------------------|-----------------------------|------------------------------|---------------|-------------------|------------------------|-------------------------|--------------------|
| 1         | Alabama     | AL        | 33660   | Mobile, AL                                   | 97         | 0             | Mobile County           | 1660                        | 1740                         | 6             | 687               | 24                     | 25                      | 1                  |
| 28        | Mississippi | MS        | 32820   | Memphis, TN-MS-AR                            | 9          | 0             | Benton County           | 6700                        | 4670                         | 6             | 195               | 34                     | 24                      | 1                  |
| 21        | Kentucky    | KY        | 21780   | Evansville, IN-KY                            | 101        | 0             | Henderson County        | 1780                        | 1870                         | 6             | 560               | 32                     | 33                      | 1                  |
| 1         | Alabama     | AL        | 100004  | Southeast Alabama nonmetropolitan area       | 109        | 0             | Pike County             | 710                         | 1090                         | 6             | 475               | 15                     | 23                      | 0                  |
| 1         | Alabama     | AL        | 100003  | Southwest Alabama nonmetropolitan area       | 129        | 0             | Washington County       | 700                         | 870                          | 6             | 438               | 16                     | 20                      | 0                  |
| 1         | Alabama     | AL        | 100002  | Northeast Alabama nonmetropolitan area       | 111        | 0             | Randolph County         | 1290                        | 1860                         | 6             | 896               | 14                     | 21                      | 0                  |
| 1         | Alabama     | AL        | 100001  | Northwest Alabama nonmetropolitan area       | 59         | 0             | Franklin County         | 720                         | 720                          | 6             | 392               | 18                     | 18                      | 0                  |
| 21        | Kentucky    | KY        | 21060   | Elizabethtown-Fort Knox, KY                  | 123        | 0             | Larue County            | 530                         | 670                          | 6             | 227               | 23                     | 29                      | 1                  |
| 21        | Kentucky    | KY        | 30460   | Lexington-Fayette, KY                        | 67         | 0             | Fayette County          | 2380                        | 3360                         | 6             | 759               | 31                     | 44                      | 1                  |
| 1         | Alabama     | AL        | 20020   | Dothan, AL                                   | 61         | 0             | Geneva County           | 630                         | 960                          | 6             | 286               | 22                     | 34                      | 1                  |
| 47        | Tennessee   | TN        | 4700001 | West Tennessee nonmetropolitan area          | 53         | 0             | Gibson County           | 1270                        | 1950                         | 6             | 867               | 15                     | 22                      | 0                  |
| 21        | Kentucky    | KY        | 2100001 | West Kentucky nonmetropolitan area           | 105        | 0             | Hickman County          | 1270                        | 1970                         | 6             | 824               | 15                     | 24                      | 0                  |
| 47        | Tennessee   | TN        | 4700002 | South Central Tennessee nonmetropolitan area | 181        | 0             | Wayne County            | 870                         | 1040                         | 6             | 642               | 14                     | 16                      | 0                  |
| 1         | Alabama     | AL        | 46220   | Tuscaloosa, AL                               | 65         | 0             | Hale County             | 990                         | 1060                         | 6             | 355               | 28                     | 30                      | 1                  |
| 47        | Tennessee   | TN        | 4700003 | North Central Tennessee                      | 25         | 0             | Claiborne County        | 1540                        | 1370                         | 6             | 757               | 20                     | 18                      | 0                  |

| State FIP | State       | State abb | Area    | Area title                                                  | County FIP | Township code | County or township name | Number of home health aides | Number of nursing assistants | Census region | Over 65 populatio | Home health aide ratio | Nursing assistant ratio | Metropolit an area |   |
|-----------|-------------|-----------|---------|-------------------------------------------------------------|------------|---------------|-------------------------|-----------------------------|------------------------------|---------------|-------------------|------------------------|-------------------------|--------------------|---|
| 47        | Tennessee   | TN        | 4700004 | nonmetropolitan area<br>East Tennessee nonmetropolitan area | 143        | 0             | Rhea County             | 1270                        | 970                          | 6             | 809               | 16                     | 12                      | 0                  |   |
| 21        | Kentucky    | KY        | 14540   | Bowling Green, KY                                           | 61         | 0             | Edmonson County         | 1120                        | 690                          | 6             | 263               | 43                     | 26                      | 1                  |   |
| 21        | Kentucky    | KY        | 2100003 | Central Kentucky nonmetropolitan area                       | 197        | 0             | Powell County           | 1770                        | 1950                         | 6             | 905               | 19                     | 22                      | 0                  |   |
| 21        | Kentucky    | KY        | 2100004 | East Kentucky nonmetropolitan area                          | 95         | 0             | Harlan County           | 1620                        | 1580                         | 6             | 729               | 12                     | 22                      | 0                  |   |
| 1         | Alabama     | AL        | 13820   | Birmingham-Hoover, AL                                       | 7          | 0             | Bibb County             | 5180                        | 4940                         | 6             | 191               | 27                     | 26                      | 1                  |   |
| 47        | Tennessee   | TN        | 28940   | Knoxville, TN                                               | 93         | 0             | Knox County             | 3980                        | 3710                         | 6             | 166               | 24                     | 22                      | 1                  |   |
| 47        | Tennessee   | TN        | 27740   | Johnson City, TN                                            | 179        | 0             | Washington County       | 780                         | 1080                         | 6             | 410               | 19                     | 26                      | 1                  |   |
| 28        | Mississippi | MS        | 2800002 | Northwest Mississippi nonmetropolitan area                  | 161        | 0             | Yalobusha County        | 2260                        | 1360                         | 6             | 486               | 14                     | 28                      | 0                  |   |
| 28        | Mississippi | MS        | 2800003 | Southeast Mississippi nonmetropolitan area                  | 41         | 0             | Greene County           | 2020                        | 1820                         | 6             | 867               | 66                     | 23                      | 21                 | 0 |
| 47        | Tennessee   | TN        | 27180   | Jackson, TN                                                 | 33         | 0             | Crockett County         | 1660                        | 800                          | 6             | 229               | 19                     | 72                      | 35                 | 1 |
| 28        | Mississippi | MS        | 27140   | Jackson, MS                                                 | 49         | 0             | Hinds County            | 8350                        | 2370                         | 6             | 870               | 81                     | 96                      | 27                 | 1 |
| 1         | Alabama     | AL        | 26620   | Huntsville, AL                                              | 83         | 0             | Limestone County        | 2380                        | 1810                         | 6             | 722               | 17                     | 33                      | 25                 | 1 |
| 1         | Alabama     | AL        | 19460   | Decatur, AL                                                 | 103        | 0             | Morgan County           | 960                         | 330                          | 6             | 276               | 28                     | 35                      | 12                 | 1 |
| 1         | Alabama     | AL        | 12220   | Auburn-Opelika, AL                                          | 81         | 0             | Lee County              | 500                         | 440                          | 6             | 204               | 12                     | 24                      | 22                 | 1 |
| 1         | Alabama     | AL        | 19300   | Daphne-Fairhope-Foley, AL                                   | 3          | 0             | Baldwin County          | 1000                        | 600                          | 6             | 468               | 30                     | 21                      | 13                 | 1 |
| 28        | Mississippi | MS        | 25620   | Hattiesburg, MS                                             | 73         | 0             | Lamar County            | 1190                        | 680                          | 6             | 217               | 43                     | 55                      | 31                 | 1 |

| State FIP | State       | State abb | Area    | Area title                                  | County FIP | Township code | County or township name | Number of home health aides | Number of nursing assistants | Census region | Over 65 populatio | Home health aide ratio | Nursing assistant ratio | Metropolit an area |
|-----------|-------------|-----------|---------|---------------------------------------------|------------|---------------|-------------------------|-----------------------------|------------------------------|---------------|-------------------|------------------------|-------------------------|--------------------|
| 28        | Mississippi | MS        | 2800004 | Southwest Mississippi nonmetropolitan area  | 77         | 0             | Lawrence County         | 1510                        | 820                          | 6             | 40664             | 37                     | 20                      | 0                  |
| 28        | Mississippi | MS        | 25060   | Gulfport-Biloxi-Pascagoula, MS              | 45         | 0             | Hancock County          | 870                         | 1220                         | 6             | 80343             | 13                     | 19                      | 1                  |
| 21        | Kentucky    | KY        | 17140   | Cincinnati, OH-KY-IN                        | 117        | 0             | Kenton County           | 13470                       | 10400                        | 6             | 558209            | 39                     | 30                      | 1                  |
| 21        | Kentucky    | KY        | 36980   | Owensboro, KY                               | 91         | 0             | Hancock County          | 870                         | 600                          | 6             | 26223             | 42                     | 29                      | 1                  |
| 47        | Tennessee   | TN        | 17420   | Cleveland, TN                               | 11         | 0             | Bradley County          | 240                         | 570                          | 6             | 75321             | 11                     | 25                      | 1                  |
| 21        | Kentucky    | KY        | 17300   | Clarksville, TN-KY                          | 221        | 0             | Trigg County            | 1020                        | 740                          | 6             | 37197             | 32                     | 23                      | 1                  |
| 1         | Alabama     | AL        | 23460   | Gadsden, AL                                 | 55         | 0             | Etowah County           | 570                         | 450                          | 6             | 96300             | 29                     | 23                      | 1                  |
| 1         | Alabama     | AL        | 22520   | Florence-Muscle Shoals, AL                  | 33         | 0             | Colbert County          | 470                         | 530                          | 6             | 72                | 16                     | 18                      | 1                  |
| 28        | Mississippi | MS        | 2800001 | Northeast Mississippi nonmetropolitan area  | 17         | 0             | Chickasaw County        | 3050                        | 2380                         | 6             | 97866             | 31                     | 24                      | 0                  |
| 21        | Kentucky    | KY        | 2100002 | South Central Kentucky nonmetropolitan area | 1          | 0             | Adair County            | 2570                        | 2220                         | 6             | 88807             | 29                     | 25                      | 0                  |
| 40        | Oklahoma    | OK        | 4000001 | Northeast Oklahoma nonmetropolitan area     | 147        | 0             | Washington County       | 1860                        | 2100                         | 7             | 69957             | 27                     | 30                      | 0                  |
| 40        | Oklahoma    | OK        | 4000002 | Northwest Oklahoma nonmetropolitan area     | 45         | 0             | Ellis County            | 630                         | 890                          | 7             | 40859             | 15                     | 22                      | 0                  |
| 40        | Oklahoma    | OK        | 4000003 | Southwest Oklahoma nonmetropolitan area     | 9          | 0             | Beckham County          | 610                         | 790                          | 7             | 33520             | 18                     | 24                      | 0                  |
| 40        | Oklahoma    | OK        | 4000004 | Southeast Oklahoma nonmetropolitan area     | 5          | 0             | Atoka County            | 2340                        | 2010                         | 7             | 87501             | 27                     | 23                      | 0                  |

| State FIP | State     | State abb | Area    | Area title                                          | County FIP | Township code | County or township name | Number of home health aides | Number of nursing assistants | Census region | Over 65 populatio | Home health aide ratio | Nursing assistant ratio | Metropolit an area |
|-----------|-----------|-----------|---------|-----------------------------------------------------|------------|---------------|-------------------------|-----------------------------|------------------------------|---------------|-------------------|------------------------|-------------------------|--------------------|
| 48        | Texas     | TX        | 4800001 | West Texas Region of Texas nonmetropolitan area     | 195        | 0             | Hansford County         | 1370                        | 1550                         | 7             | 84509             | 16                     | 18                      | 0                  |
| 48        | Texas     | TX        | 4800002 | North Texas Region of Texas nonmetropolitan area    | 467        | 0             | Van Zandt County        | 6940                        | 2410                         | 7             | 176940            | 39                     | 14                      | 0                  |
| 48        | Texas     | TX        | 4800003 | Big Thicket Region of Texas nonmetropolitan area    | 5          | 0             | Angelina County         | 3970                        | 990                          | 7             | 71836             | 55                     | 14                      | 0                  |
| 48        | Texas     | TX        | 4800004 | Hill Country Region of Texas nonmetropolitan area   | 35         | 0             | Bosque County           | 3490                        | 1780                         | 7             | 138556            | 25                     | 13                      | 0                  |
| 48        | Texas     | TX        | 4800005 | Border Region of Texas nonmetropolitan area         | 323        | 0             | Maverick County         | 3800                        | 390                          | 7             | 25528             | 149                    | 15                      | 0                  |
| 48        | Texas     | TX        | 4800006 | Coastal Plains Region of Texas nonmetropolitan area | 505        | 0             | Zapata County           | 9860                        | 1160                         | 7             | 75198             | 131                    | 15                      | 0                  |
| 48        | Texas     | TX        | 10180   | Abilene, TX                                         | 59         | 0             | Callahan County         | 1730                        | 750                          | 7             | 26277             | 66                     | 29                      | 1                  |
| 22        | Louisiana | LA        | 10780   | Alexandria, LA                                      | 79         | 0             | Rapides Parish          | 2750                        | 730                          | 7             | 25183             | 109                    | 29                      | 1                  |
| 48        | Texas     | TX        | 11100   | Amarillo, TX                                        | 65         | 0             | Carson County           | 1600                        | 970                          | 7             | 38663             | 41                     | 25                      | 1                  |
| 48        | Texas     | TX        | 12420   | Austin-Round Rock, TX                               | 453        | 0             | Travis County           | 12000                       | 4230                         | 7             | 249319            | 48                     | 17                      | 1                  |
| 22        | Louisiana | LA        | 12940   | Baton Rouge, LA                                     | 121        | 0             | West Baton Rouge Parish | 5670                        | 3150                         | 7             | 120491            | 47                     | 26                      | 1                  |
| 48        | Texas     | TX        | 13140   | Beaumont-Port Arthur, TX                            | 361        | 0             | Orange County           | 3890                        | 980                          | 7             | 63964             | 61                     | 15                      | 1                  |
| 48        | Texas     | TX        | 15180   | Brownsville-Harlingen, TX                           | 61         | 0             | Cameron County          | 18110                       | 1030                         | 7             | 58607             | 309                    | 18                      | 1                  |
| 48        | Texas     | TX        | 17780   | College Station-Bryan, TX                           | 41         | 0             | Brazos County           | 1150                        | 540                          | 7             | 28972             | 40                     | 19                      | 1                  |
| 48        | Texas     | TX        | 18580   | Corpus Christi, TX                                  | 7          | 0             | Aransas County          | 7570                        | 1330                         | 7             | 71069             | 107                    | 19                      | 1                  |

| State FIP | State     | State abb | Area  | Area title                               | County FIP | Township code | County or township name | Number of home health aides | Number of nursing assistants | Census region | Over 65 populatio | Home health aide ratio | Nursing assistant ratio | Metropolit an area |
|-----------|-----------|-----------|-------|------------------------------------------|------------|---------------|-------------------------|-----------------------------|------------------------------|---------------|-------------------|------------------------|-------------------------|--------------------|
| 48        | Texas     | TX        | 19100 | Dallas-Fort Worth-Arlington, TX          | 367        | 0             | Parker County           | 53160                       | 18530                        | 7             | 891<br>574        | 60                     | 21                      | 1                  |
| 48        | Texas     | TX        | 21340 | El Paso, TX                              | 141        | 0             | El Paso County          | 13110                       | 1720                         | 7             | 105<br>950        | 124                    | 16                      | 1                  |
| 40        | Oklahoma  | OK        | 21420 | Enid, OK                                 | 47         | 0             | Garfield County         | 180                         | 390                          | 7             | 100<br>55         | 18                     | 39                      | 1                  |
| 5         | Arkansas  | AR        | 22900 | Fort Smith, AR-OK                        | 33         | 0             | Crawford County         | 2180                        | 1530                         | 7             | 487<br>74         | 45                     | 31                      | 1                  |
| 22        | Louisiana | LA        | 25220 | Hammond, LA                              | 105        | 0             | Tangipahoa Parish       | 1550                        | 580                          | 7             | 201<br>12         | 77                     | 29                      | 1                  |
| 5         | Arkansas  | AR        | 26300 | Hot Springs, AR                          | 51         | 0             | Garland County          | 710                         | 870                          | 7             | 241<br>44         | 29                     | 36                      | 1                  |
| 22        | Louisiana | LA        | 26380 | Houma-Thibodaux, LA                      | 109        | 0             | Terrebonne Parish       | 1120                        | 670                          | 7             | 320<br>73         | 35                     | 21                      | 1                  |
| 48        | Texas     | TX        | 26420 | Houston-The Woodlands-Sugar Land, TX     | 291        | 0             | Liberty County          | 60090                       | 15940                        | 7             | 815<br>351        | 74                     | 20                      | 1                  |
| 5         | Arkansas  | AR        | 27860 | Jonesboro, AR                            | 111        | 0             | Poinsett County         | 1000                        | 800                          | 7             | 197<br>45         | 51                     | 41                      | 1                  |
| 48        | Texas     | TX        | 28660 | Killeen-Temple, TX                       | 99         | 0             | Coryell County          | 2620                        | 1370                         | 7             | 528<br>96         | 50                     | 26                      | 1                  |
| 22        | Louisiana | LA        | 29180 | Lafayette, LA                            | 99         | 0             | St. Martin Parish       | 4400                        | 1900                         | 7             | 721<br>83         | 61                     | 26                      | 1                  |
| 22        | Louisiana | LA        | 29340 | Lake Charles, LA                         | 19         | 0             | Calcasieu Parish        | 1450                        |                              | 7             | 321<br>48         | 45                     |                         | 1                  |
| 48        | Texas     | TX        | 29700 | Laredo, TX                               | 479        | 0             | Webb County             | 7340                        | 490                          | 7             | 269<br>21         | 273                    | 18                      | 1                  |
| 40        | Oklahoma  | OK        | 30020 | Lawton, OK                               | 31         | 0             | Comanche County         | 230                         | 370                          | 7             | 167<br>57         | 14                     | 22                      | 1                  |
| 5         | Arkansas  | AR        | 30780 | Little Rock-North Little Rock-Conway, AR | 105        | 0             | Perry County            | 5370                        | 4920                         | 7             | 117<br>075        | 46                     | 42                      | 1                  |
| 48        | Texas     | TX        | 30980 | Longview, TX                             | 459        | 0             | Upshur County           | 2450                        | 730                          | 7             | 364<br>73         | 67                     | 20                      | 1                  |
| 48        | Texas     | TX        | 31180 | Lubbock, TX                              | 305        | 0             | Lynn County             | 2760                        | 1210                         | 7             | 415<br>35         | 66                     | 29                      | 1                  |
| 48        | Texas     | TX        | 32580 | McAllen-Edinburg-Mission, TX             | 215        | 0             | Hidalgo County          | 39190                       | 1650                         | 7             | 983<br>28         | 399                    | 17                      | 1                  |
| 48        | Texas     | TX        | 33260 | Midland, TX                              | 329        | 0             | Midland County          | 930                         | 470                          | 7             | 190<br>97         | 49                     | 25                      | 1                  |
| 22        | Louisiana | LA        | 33740 | Monroe, LA                               | 111        | 0             | Union Parish            | 2860                        | 1230                         | 7             | 281<br>71         | 102                    | 44                      | 1                  |



| State FIP | State     | State abb | Area   | Area title                          | County FIP | Township code | County or township name | Number of home health aides | Number of nursing assistants | Census region | Over 65 populatio | Home health aide ratio | Nursing assistant ratio | Metropolit an area |
|-----------|-----------|-----------|--------|-------------------------------------|------------|---------------|-------------------------|-----------------------------|------------------------------|---------------|-------------------|------------------------|-------------------------|--------------------|
| 22        | Louisiana | LA        | 35380  | New Orleans-Metairie, LA            | 103        | 0             | St. Tammany Parish      | 6360                        | 4400                         | 7             | 209197            | 30                     | 21                      | 1                  |
| 48        | Texas     | TX        | 36220  | Odessa, TX                          | 135        | 0             | Ector County            | 770                         | 320                          | 7             | 70                | 48                     | 20                      | 1                  |
| 40        | Oklahoma  | OK        | 36420  | Oklahoma City, OK                   | 87         | 0             | McClain County          | 5100                        | 5100                         | 7             | 200               | 25                     | 25                      | 1                  |
| 5         | Arkansas  | AR        | 38220  | Pine Bluff, AR                      | 25         | 0             | Cleveland County        | 550                         | 500                          | 7             | 800157            | 35                     | 32                      | 1                  |
| 48        | Texas     | TX        | 41660  | San Angelo, TX                      | 235        | 0             | Irion County            | 710                         | 380                          | 7             | 89                | 37                     | 20                      | 1                  |
| 48        | Texas     | TX        | 41700  | San Antonio-New Braunfels, TX       | 259        | 0             | Kendall County          | 31740                       | 6330                         | 7             | 340               | 93                     | 19                      | 1                  |
| 48        | Texas     | TX        | 43300  | Sherman-Denison, TX                 | 181        | 0             | Grayson County          | 3330                        | 320                          | 7             | 241               | 138                    | 13                      | 1                  |
| 22        | Louisiana | LA        | 43340  | Shreveport-Bossier City, LA         | 31         | 0             | De Soto Parish          | 3380                        | 2250                         | 7             | 742               | 46                     | 30                      | 1                  |
| 48        | Texas     | TX        | 45500  | Texarkana, TX-AR                    | 37         | 0             | Bowie County            | 1240                        | 770                          | 7             | 43                | 48                     | 30                      | 1                  |
| 40        | Oklahoma  | OK        | 46140  | Tulsa, OK                           | 145        | 0             | Wagoner County          | 5020                        | 4800                         | 7             | 39                | 32                     | 30                      | 1                  |
| 48        | Texas     | TX        | 46340  | Tyler, TX                           | 423        | 0             | Smith County            | 4390                        | 1380                         | 7             | 744               | 112                    | 35                      | 1                  |
| 48        | Texas     | TX        | 47020  | Victoria, TX                        | 175        | 0             | Goliad County           | 790                         | 410                          | 7             | 37                | 46                     | 24                      | 1                  |
| 48        | Texas     | TX        | 47380  | Waco, TX                            | 145        | 0             | Falls County            | 2700                        | 940                          | 7             | 74                | 66                     | 23                      | 1                  |
| 48        | Texas     | TX        | 48660  | Wichita Falls, TX                   | 77         | 0             | Clay County             | 1490                        | 550                          | 7             | 409               | 62                     | 23                      | 1                  |
| 5         | Arkansas  | AR        | 500001 | North Arkansas nonmetropolitan area | 15         | 0             | Carroll County          | 1520                        | 2570                         | 7             | 873               | 17                     | 29                      | 0                  |
| 5         | Arkansas  | AR        | 500002 | East Arkansas nonmetropolitan area  | 95         | 0             | Monroe County           | 1080                        | 1200                         | 7             | 396               | 27                     | 30                      | 0                  |
| 5         | Arkansas  | AR        | 500003 | West Arkansas nonmetropolitan area  | 59         | 0             | Hot Spring County       | 1070                        | 1290                         | 7             | 525               | 20                     | 25                      | 0                  |
| 5         | Arkansas  | AR        | 500004 | South Arkansas nonmetropolitan area | 43         | 0             | Drew County             | 1330                        | 1410                         | 7             | 74                | 27                     | 29                      | 0                  |

| State FIP | State     | State abb | Area    | Area title                               | County FIP | Township code | County or township name | Number of home health aides | Number of nursing assistants | Census region | Over 65 populatio | Home health aide ratio | Nursing assistant ratio | Metropolit an area |
|-----------|-----------|-----------|---------|------------------------------------------|------------|---------------|-------------------------|-----------------------------|------------------------------|---------------|-------------------|------------------------|-------------------------|--------------------|
| 22        | Louisiana | LA        | 2200002 | Central Louisiana nonmetropolitan area   | 81         | 0             | Red River Parish        | 1730                        | 1590                         | 7             | 46590             | 37                     | 34                      | 0                  |
| 22        | Louisiana | LA        | 2200003 | Northeast Louisiana nonmetropolitan area | 41         | 0             | Franklin Parish         | 2170                        | 1360                         | 7             | 40676             | 53                     | 33                      | 0                  |
| 22        | Louisiana | LA        | 2200006 | Southwest Louisiana nonmetropolitan area | 117        | 0             | Washington Parish       | 2000                        | 770                          | 7             | 39955             | 50                     | 19                      | 0                  |
| 49        | Utah      | UT        | 4900006 | Eastern Utah nonmetropolitan area        | 13         | 0             | Duchesne County         | 730                         | 440                          | 8             | 26674             | 27                     | 16                      | 0                  |
| 30        | Montana   | MT        | 33540   | Missoula, MT                             | 63         | 0             | Missoula County         | 1730                        | 430                          | 8             | 19337             | 89                     | 22                      | 1                  |
| 32        | Nevada    | NV        | 16180   | Carson City, NV                          | 510        | 0             | Carson City             | 540                         | 250                          | 8             | 11573             | 47                     | 22                      | 1                  |
| 56        | Wyoming   | WY        | 16220   | Casper, WY                               | 25         | 0             | Natrona County          | 520                         | 470                          | 8             | 12717             | 41                     | 37                      | 1                  |
| 56        | Wyoming   | WY        | 16940   | Cheyenne, WY                             | 21         | 0             | Laramie County          | 670                         | 510                          | 8             | 16390             | 41                     | 31                      | 1                  |
| 16        | Idaho     | ID        | 17660   | Coeur d'Alene, ID                        | 55         | 0             | Kootenai County         | 1530                        | 820                          | 8             | 32193             | 48                     | 25                      | 1                  |
| 8         | Colorado  | CO        | 17820   | Colorado Springs, CO                     | 119        | 0             | Teller County           | 5740                        | 2740                         | 8             | 101066            | 57                     | 27                      | 1                  |
| 56        | Wyoming   | WY        | 5600006 | Western Wyoming nonmetropolitan area     | 23         | 0             | Lincoln County          | 1390                        | 1180                         | 8             | 37863             | 37                     | 31                      | 0                  |
| 49        | Utah      | UT        | 36260   | Ogden-Clearfield, UT                     | 29         | 0             | Morgan County           | 2930                        | 2260                         | 8             | 76352             | 38                     | 30                      | 1                  |
| 4         | Arizona   | AZ        | 38060   | Phoenix-Mesa-Scottsdale, AZ              | 21         | 0             | Pinal County            | 50830                       | 11140                        | 8             | 792897            | 64                     | 14                      | 1                  |
| 16        | Idaho     | ID        | 38540   | Pocatello, ID                            | 5          | 0             | Bannock County          | 1180                        | 380                          | 8             | 12894             | 92                     | 29                      | 1                  |
| 4         | Arizona   | AZ        | 39140   | Prescott, AZ                             | 25         | 0             | Yavapai County          | 1280                        | 780                          | 8             | 76438             | 17                     | 10                      | 1                  |
| 49        | Utah      | UT        | 39340   | Provo-Orem, UT                           | 23         | 0             | Juab County             | 3600                        | 1890                         | 8             | 51917             | 69                     | 36                      | 1                  |
| 8         | Colorado  | CO        | 39380   | Pueblo, CO                               | 101        | 0             | Pueblo County           | 2040                        | 880                          | 8             | 31933             | 64                     | 28                      | 1                  |

| State FIP | State      | State abb | Area    | Area title                                                  | County FIP | Township code | County or township name | Number of home health aides | Number of nursing assistants | Census region | Over 65 populatio | Home health aide ratio | Nursing assistant ratio | Metropolit an area |
|-----------|------------|-----------|---------|-------------------------------------------------------------|------------|---------------|-------------------------|-----------------------------|------------------------------|---------------|-------------------|------------------------|-------------------------|--------------------|
| 32        | Nevada     | NV        | 39900   | Reno, NV Eastern and Southern Colorado nonmetropolitan area | 29         | 0             | Storey County           | 1980                        | 1260                         | 8             | 80704             | 25                     | 16                      | 1                  |
| 8         | Colorado   | CO        | 800001  | Costilla County Washington                                  | 23         | 0             | Costilla County         | 1440                        | 1070                         | 8             | 41757             | 34                     | 26                      | 0                  |
| 49        | Utah       | UT        | 41100   | St. George, UT                                              | 53         | 0             | County Salt Lake        | 990                         | 1110                         | 8             | 39067             | 25                     | 28                      | 1                  |
| 49        | Utah       | UT        | 41620   | Salt Lake City, UT Southwest Colorado nonmetropolitan area  | 35         | 0             | County                  | 5970                        | 5710                         | 8             | 136799            | 44                     | 42                      | 1                  |
| 8         | Colorado   | CO        | 800002  | Northwest Colorado nonmetropolitan area                     | 91         | 0             | Ouray County            | 1970                        | 770                          | 8             | 60616             | 32                     | 13                      | 0                  |
| 8         | Colorado   | CO        | 800003  | Northwestern Idaho nonmetropolitan area                     | 49         | 0             | Grand County            | 540                         | 460                          | 8             | 34994             | 15                     | 13                      | 0                  |
| 16        | Idaho      | ID        | 1600006 | Southeast-Central Idaho nonmetropolitan area                | 61         | 0             | Lewis County            | 1450                        | 730                          | 8             | 48666             | 30                     | 15                      | 0                  |
| 16        | Idaho      | ID        | 1600007 | Central Utah nonmetropolitan area                           | 11         | 0             | Bingham County          | 1190                        | 760                          | 8             | 37369             | 32                     | 20                      | 0                  |
| 49        | Utah       | UT        | 4900007 | Iron County Santa Fe                                        | 21         | 0             | Iron County             | 350                         | 470                          | 8             | 22493             | 16                     | 21                      | 0                  |
| 35        | New Mexico | NM        | 42140   | Santa Fe, NM                                                | 49         | 0             | County                  | 1380                        | 330                          | 8             | 38106             | 36                     | 9                       | 1                  |
| 8         | Colorado   | CO        | 14500   | Boulder, CO                                                 | 13         | 0             | Boulder County          | 2090                        | 1010                         | 8             | 48358             | 43                     | 21                      | 1                  |
| 4         | Arizona    | AZ        | 43420   | Sierra Vista-Douglas, AZ                                    | 3          | 0             | Cochise County          | 440                         | 210                          | 8             | 29118             | 15                     | 7                       | 1                  |
| 4         | Arizona    | AZ        | 29420   | Lake Havasu City-Kingman, AZ                                | 15         | 0             | Mohave County           | 710                         | 510                          | 8             | 65910             | 11                     | 8                       | 1                  |
| 35        | New Mexico | NM        | 29740   | Las Cruces, NM                                              | 13         | 0             | Dona Ana County         | 4880                        | 430                          | 8             | 35414             | 138                    | 12                      | 1                  |

| State FIP | State      | State abb | Area    | Area title                                | County FIP | Township code | County or township name | Number of home health aides | Number of nursing assistants | Census region | Over 65 populatio | Home health aide ratio | Nursing assistant ratio | Metropolit an area |
|-----------|------------|-----------|---------|-------------------------------------------|------------|---------------|-------------------------|-----------------------------|------------------------------|---------------|-------------------|------------------------|-------------------------|--------------------|
| 32        | Nevada     | NV        | 29820   | Las Vegas-Henderson-Paradise, NV          | 3          | 0             | Clark County            | 10490                       | 6240                         | 8             | 342659            | 31                     | 18                      | 1                  |
| 4         | Arizona    | AZ        | 46060   | Tucson, AZ                                | 19         | 0             | Pima County             | 10240                       | 3580                         | 8             | 212554            | 48                     | 17                      | 1                  |
| 16        | Idaho      | ID        | 30300   | Lewiston, ID-WA                           | 69         | 0             | Nez Perce County        | 700                         | 370                          | 8             | 13578             | 52                     | 27                      | 1                  |
| 16        | Idaho      | ID        | 46300   | Twin Falls, ID                            | 53         | 0             | Jerome County           | 950                         | 500                          | 8             | 16821             | 56                     | 30                      | 1                  |
| 8         | Colorado   | CO        | 19740   | Denver-Aurora-Lakewood, CO                | 47         | 0             | Gilpin County           | 21140                       | 10720                        | 8             | 395195            | 53                     | 27                      | 1                  |
| 30        | Montana    | MT        | 3000003 | Southwest Montana nonmetropolitan area    | 57         | 0             | Madison County          | 2190                        | 840                          | 8             | 54502             | 40                     | 15                      | 0                  |
| 4         | Arizona    | AZ        | 49740   | Yuma, AZ                                  | 27         | 0             | Yuma County             | 990                         | 460                          | 8             | 41302             | 24                     | 11                      | 1                  |
| 30        | Montana    | MT        | 3000004 | West Montana nonmetropolitan area         | 81         | 0             | Ravalli County          | 1530                        | 630                          | 8             | 50642             | 30                     | 12                      | 0                  |
| 30        | Montana    | MT        | 3000006 | East-Central Montana nonmetropolitan area | 65         | 0             | Musselshell County      | 1030                        | 1040                         | 8             | 35217             | 29                     | 30                      | 0                  |
| 4         | Arizona    | AZ        | 400001  | Arizona nonmetropolitan area              | 1          | 0             | Apache County           | 1160                        | 800                          | 8             | 71752             | 16                     | 11                      | 0                  |
| 35        | New Mexico | NM        | 22140   | Farmington, NM                            | 45         | 0             | San Juan County         | 1730                        | 390                          | 8             | 19397             | 89                     | 20                      | 1                  |
| 4         | Arizona    | AZ        | 22380   | Flagstaff, AZ                             | 5          | 0             | Coconino County         | 960                         | 350                          | 8             | 18662             | 51                     | 19                      | 1                  |
| 8         | Colorado   | CO        | 22660   | Fort Collins, CO                          | 69         | 0             | Larimer County          | 2260                        | 1530                         | 8             | 57774             | 39                     | 26                      | 1                  |
| 35        | New Mexico | NM        | 10740   | Albuquerque, NM                           | 1          | 0             | Bernalillo County       | 14240                       | 2140                         | 8             | 159290            | 89                     | 13                      | 1                  |
| 8         | Colorado   | CO        | 24300   | Grand Junction, CO                        | 77         | 0             | Mesa County             | 1420                        | 770                          | 8             | 30368             | 47                     | 25                      | 1                  |
| 30        | Montana    | MT        | 24500   | Great Falls, MT                           | 13         | 0             | Cascade County          | 780                         | 460                          | 8             | 15555             | 50                     | 30                      | 1                  |
| 8         | Colorado   | CO        | 24540   | Greeley, CO                               | 123        | 0             | Weld County             | 1260                        | 650                          | 8             | 40351             | 31                     | 16                      | 1                  |

| State FIP | State      | State abb | Area    | Area title                                                                | County FIP | Township code | County or township name | Number of home health aides | Number of nursing assistants | Census region | Over 65 populatio | Home health aide ratio | Nursing assistant ratio | Metropolit an area |
|-----------|------------|-----------|---------|---------------------------------------------------------------------------|------------|---------------|-------------------------|-----------------------------|------------------------------|---------------|-------------------|------------------------|-------------------------|--------------------|
| 32        | Nevada     | NV        | 3200006 | Nevada nonmetropolitan area                                               | 27         | 0             | Pershing County         | 460                         | 390                          | 8             | 61036             | 8                      | 6                       | 0                  |
| 35        | New Mexico | NM        | 3500007 | Eastern New Mexico nonmetropolitan area                                   | 5          | 0             | Chaves County           | 5970                        | 940                          | 8             | 79132             | 75                     | 12                      | 0                  |
| 16        | Idaho      | ID        | 14260   | Boise City, ID                                                            | 73         | 0             | Owyhee County           | 8360                        | 2860                         | 8             | 112349            | 74                     | 25                      | 1                  |
| 16        | Idaho      | ID        | 26820   | Idaho Falls, ID                                                           | 23         | 0             | Butte County            | 2320                        | 450                          | 8             | 20181             | 115                    | 22                      | 1                  |
| 16        | Idaho      | ID        | 30860   | Logan, UT-ID                                                              | 41         | 0             | Franklin County         | 940                         | 570                          | 8             | 14599             | 64                     | 39                      | 1                  |
| 30        | Montana    | MT        | 13740   | Billings, MT                                                              | 111        | 0             | Yellowstone County      | 1290                        | 980                          | 8             | 31184             | 41                     | 31                      | 1                  |
| 35        | New Mexico | NM        | 3500006 | Northern New Mexico nonmetropolitan area                                  | 55         | 0             | Taos County             | 4640                        | 670                          | 8             | 46267             | 100                    | 14                      | 0                  |
| 56        | Wyoming    | WY        | 5600007 | Eastern Wyoming nonmetropolitan area                                      | 9          | 0             | Converse County         | 870                         | 660                          | 8             | 32209             | 27                     | 20                      | 0                  |
| 6         | California | CA        | 600007  | North Valley-Northern Mountains Region of California nonmetropolitan area | 35         | 0             | Lassen County           | 3430                        | 670                          | 9             | 77199             | 44                     | 9                       | 0                  |
| 41        | Oregon     | OR        | 4100008 | Eastern Oregon nonmetropolitan area                                       | 25         | 0             | Harney County           | 1110                        | 380                          | 9             | 35873             | 31                     | 11                      | 0                  |
| 41        | Oregon     | OR        | 4100007 | Central Oregon nonmetropolitan area                                       | 37         | 0             | Lake County             | 750                         | 530                          | 9             | 38688             | 19                     | 14                      | 0                  |
| 41        | Oregon     | OR        | 4100006 | Coast Oregon nonmetropolitan area                                         | 57         | 0             | Tillamook County        | 2170                        | 780                          | 9             | 85535             | 25                     | 9                       | 0                  |
| 15        | Hawaii     | HI        | 1500001 | Hawaii / Kauai nonmetropolitan area                                       | 1          | 0             | Hawaii County           | 1380                        | 1060                         | 9             | 58992             | 23                     | 18                      | 0                  |
| 2         |            |           |         |                                                                           | 261        |               |                         |                             |                              | 9             | 16810             |                        |                         | 0                  |

| State FIP | State      | State abb | Area   | Area title                                                           | County FIP | Township code | County or township name      | Number of home health aides | Number of nursing assistants | Census region | Over 65 populatio | Home health aide ratio | Nursing assistant ratio | Metropolit an area |
|-----------|------------|-----------|--------|----------------------------------------------------------------------|------------|---------------|------------------------------|-----------------------------|------------------------------|---------------|-------------------|------------------------|-------------------------|--------------------|
| 6         | California | CA        | 600006 | Eastern Sierra-Mother Lode Region of California nonmetropolitan area | 51         | 0             | Mono County                  | 1680                        | 310                          | 9             | 503               | 33                     | 6                       | 0                  |
| 6         | California | CA        | 600003 | North Coast Region of California nonmetropolitan area                | 23         | 0             | Humboldt County              | 6880                        | 600                          | 9             | 651               | 106                    | 9                       | 0                  |
| 6         | California | CA        | 12540  | Bakersfield, CA                                                      | 29         | 0             | Kern County                  | 9600                        | 1360                         | 9             | 101               | 95                     | 13                      | 1                  |
| 53        | Washington | WA        | 28420  | Kennewick-Richland, WA                                               | 5          | 0             | Benton County                | 3370                        | 970                          | 9             | 406               | 83                     | 24                      | 1                  |
| 15        | Hawaii     | HI        | 27980  | Kahului-Wailuku-Lahaina, HI                                          | 5          | 0             | Kalawao County               | 690                         | 350                          | 9             | 317               | 22                     | 11                      | 1                  |
| 2         | Alaska     | AK        | 11260  | Anchorage, AK                                                        | 20         | 0             | Anchorage Borough            | 4160                        | 1000                         | 9             | 475               | 88                     | 21                      | 1                  |
| 6         | California | CA        | 25260  | Hanford-Corcoran, CA                                                 | 31         | 0             | Kings County                 | 2260                        |                              | 9             | 160               | 141                    |                         | 1                  |
| 41        | Oregon     | OR        | 24420  | Grants Pass, OR                                                      | 33         | 0             | Josephine County             | 2550                        | 290                          | 9             | 230               | 111                    | 13                      | 1                  |
| 6         | California | CA        | 23420  | Fresno, CA                                                           | 19         | 0             | Fresno County                | 22470                       | 2510                         | 9             | 125               | 179                    | 20                      | 1                  |
| 41        | Oregon     | OR        | 10540  | Albany, OR                                                           | 43         | 0             | Linn County                  | 1810                        | 490                          | 9             | 247               | 73                     | 20                      | 1                  |
| 2         | Alaska     | AK        | 21820  | Fairbanks, AK                                                        | 90         | 0             | Fairbanks North Star Borough | 660                         | 190                          | 9             | 108               | 61                     | 18                      | 1                  |
| 41        | Oregon     | OR        | 21660  | Eugene, OR                                                           | 39         | 0             | Lane County                  | 4380                        | 1260                         | 9             | 761               | 57                     | 17                      | 1                  |
| 6         | California | CA        | 20940  | El Centro, CA                                                        | 25         | 0             | Imperial County              | 5930                        | 180                          | 9             | 241               | 246                    | 7                       | 1                  |
| 2         | Alaska     | AK        | 200006 | Alaska nonmetropolitan area                                          | 198        | 0             | Prince of Wales-Hyder        | 1580                        | 570                          | 9             | 319               | 49                     | 18                      | 0                  |
| 6         | California | CA        | 49700  | Yuba City, CA                                                        | 115        | 0             | Yuba County                  | 2280                        | 460                          | 9             | 253               | 90                     | 18                      | 1                  |
| 53        | Washington | WA        | 49420  | Yakima, WA                                                           | 77         | 0             | Yakima County                | 1720                        | 1000                         | 9             | 352               | 49                     | 28                      | 1                  |
| 53        | Washington | WA        | 48300  | Wenatchee, WA                                                        | 7          | 0             | Chelan County                | 490                         | 450                          | 9             | 230               | 21                     | 20                      | 1                  |

| State FIP | State      | State abb | Area    | Area title                                    | County FIP | Township code | County or township name | Number of home health aides | Number of nursing assistants | Census region | Over 65 populatio | Home health aide ratio | Nursing assistant ratio | Metropolit an area |
|-----------|------------|-----------|---------|-----------------------------------------------|------------|---------------|-------------------------|-----------------------------|------------------------------|---------------|-------------------|------------------------|-------------------------|--------------------|
| 53        | Washington | WA        | 47460   | Walla Walla, WA                               | 71         | 0             | Walla Walla County      | 930                         | 350                          | 9             | 124               | 74                     | 28                      | 1                  |
| 6         | California | CA        | 47300   | Visalia-Porterville, CA                       | 107        | 0             | Tulare County           | 5320                        | 1170                         | 9             | 542               | 98                     | 22                      | 1                  |
| 6         | California | CA        | 46700   | Vallejo-Fairfield, CA                         | 95         | 0             | Solano County           | 5630                        | 870                          | 9             | 731               | 77                     | 12                      | 1                  |
| 15        | Hawaii     | HI        | 46520   | Urban Honolulu, HI                            | 3          | 0             | Honolulu County         | 4530                        | 3840                         | 9             | 177               | 25                     | 22                      | 1                  |
| 6         | California | CA        | 44700   | Stockton-Lodi, CA                             | 77         | 0             | San Joaquin County      | 8300                        | 2010                         | 9             | 668               | 83                     | 20                      | 1                  |
| 53        | Washington | WA        | 44060   | Spokane-Spokane Valley, WA                    | 63         | 0             | Spokane County          | 5780                        | 2620                         | 9             | 997               | 57                     | 26                      | 1                  |
| 53        | Washington | WA        | 5300006 | Western Washington nonmetropolitan area       | 27         | 0             | Grays Harbor County     | 1670                        | 980                          | 9             | 121               | 14                     | 8                       | 0                  |
| 53        | Washington | WA        | 42660   | Seattle-Tacoma-Bellevue, WA                   | 61         | 0             | Snohomish County        | 38820                       | 13850                        | 9             | 547               | 71                     | 25                      | 1                  |
| 6         | California | CA        | 42220   | Santa Rosa, CA                                | 97         | 0             | Sonoma County           | 7260                        | 1010                         | 9             | 102               | 71                     | 10                      | 1                  |
| 6         | California | CA        | 42200   | Santa Maria-Santa Barbara, CA                 | 83         | 0             | Santa Barbara County    | 4920                        | 1040                         | 9             | 323               | 70                     | 15                      | 1                  |
| 6         | California | CA        | 42100   | Santa Cruz-Watsonville, CA                    | 87         | 0             | Santa Cruz County       | 3610                        | 310                          | 9             | 701               | 76                     | 7                       | 1                  |
| 6         | California | CA        | 42020   | San Luis Obispo-Paso Robles-Arroyo Grande, CA | 79         | 0             | San Luis Obispo County  | 3160                        | 550                          | 9             | 472               | 54                     | 9                       | 1                  |
| 6         | California | CA        | 41940   | San Jose-Sunnyvale-Santa Clara, CA            | 69         | 0             | San Benito County       | 35850                       | 4940                         | 9             | 276               | 130                    | 18                      | 1                  |
| 6         | California | CA        | 41860   | San Francisco-Oakland-Hayward, CA             | 75         | 0             | San Francisco County    | 88750                       | 10220                        | 9             | 754               | 118                    | 14                      | 1                  |
| 6         | California | CA        | 41740   | San Diego-Carlsbad, CA                        | 73         | 0             | San Diego County        | 39360                       | 8560                         | 9             | 484               | 81                     | 18                      | 1                  |
| 6         | California | CA        | 41500   | Salinas, CA                                   | 53         | 0             | Monterey County         | 5420                        | 810                          | 9             | 607               | 89                     | 13                      | 1                  |
| 53        | Washington | WA        | 13380   | Bellingham, WA                                | 73         | 0             | Whatcom County          | 1090                        | 720                          | 9             | 412               | 26                     | 17                      | 1                  |
| 41        | Oregon     | OR        | 13460   | Bend-Redmond, OR                              | 17         | 0             | Deschutes County        | 1500                        | 430                          | 9             | 05                | 37                     | 11                      | 1                  |

| State FIP | State      | State abb | Area    | Area title                              | County FIP | Township code | County or township name | Number of home health aides | Number of nursing assistants | Census region | Over 65 populatio | Home health aide ratio | Nursing assistant ratio | Metropolit an area |
|-----------|------------|-----------|---------|-----------------------------------------|------------|---------------|-------------------------|-----------------------------|------------------------------|---------------|-------------------|------------------------|-------------------------|--------------------|
| 53        | Washington | WA        | 31020   | Longview, WA                            | 15         | 0             | Cowlitz County          | 1290                        | 530                          | 9             | 21379             | 60                     | 25                      | 1                  |
| 6         | California | CA        | 31080   | Los Angeles-Long Beach-Anaheim, CA      | 59         | 0             | Orange County           | 301130                      | 38030                        | 9             | 189932            | 159                    | 20                      | 1                  |
| 6         | California | CA        | 31460   | Madera, CA                              | 39         | 0             | Madera County           | 2180                        | 470                          | 9             | 22573             | 97                     | 21                      | 1                  |
| 41        | Oregon     | OR        | 32780   | Medford, OR                             | 29         | 0             | Jackson County          | 2360                        | 820                          | 9             | 4848              | 47                     | 16                      | 1                  |
| 6         | California | CA        | 32900   | Merced, CA                              | 47         | 0             | Merced County           | 3140                        | 350                          | 9             | 36498             | 99                     | 11                      | 1                  |
| 53        | Washington | WA        | 14740   | Bremerton-Silverdale, WA                | 35         | 0             | Kitsap County           | 1560                        | 880                          | 9             | 58739             | 31                     | 18                      | 1                  |
| 6         | California | CA        | 33700   | Modesto, CA                             | 99         | 0             | Stanislaus County       | 6740                        | 1530                         | 9             | 21277             | 91                     | 21                      | 1                  |
| 53        | Washington | WA        | 34580   | Mount Vernon-Anacortes, WA              | 57         | 0             | Skagit County           | 560                         | 440                          | 9             | 80271             | 20                     | 16                      | 1                  |
| 6         | California | CA        | 34900   | Napa, CA                                | 55         | 0             | Napa County             | 2120                        | 550                          | 9             | 57402             | 78                     | 20                      | 1                  |
| 6         | California | CA        | 17020   | Chico, CA                               | 7          | 0             | Butte County            | 4840                        | 920                          | 9             | 28156             | 120                    | 23                      | 1                  |
| 41        | Oregon     | OR        | 18700   | Corvallis, OR                           | 3          | 0             | Benton County           | 680                         | 310                          | 9             | 39518             | 43                     | 20                      | 1                  |
| 53        | Washington | WA        | 36500   | Olympia-Tumwater, WA                    | 67         | 0             | Thurston County         | 1650                        | 920                          | 9             | 71136             | 32                     | 18                      | 1                  |
| 6         | California | CA        | 37100   | Oxnard-Thousand Oaks-Ventura, CA        | 111        | 0             | Ventura County          | 10050                       | 1580                         | 9             | 705               | 74                     | 12                      | 1                  |
| 53        | Washington | WA        | 5300007 | Eastern Washington nonmetropolitan area | 39         | 0             | Klickitat County        |                             | 650                          | 9             | 49758             |                        | 13                      | 0                  |
| 53        | Washington | WA        | 38900   | Portland-Vancouver-Hillsboro, OR-WA     | 59         | 0             | Skamania County         | 15490                       | 7430                         | 9             | 384456            | 40                     | 19                      | 1                  |
| 6         | California | CA        | 39820   | Redding, CA                             | 89         | 0             | Shasta County           | 3780                        | 540                          | 9             | 38069             | 99                     | 14                      | 1                  |
| 6         | California | CA        | 40140   | Riverside-San Bernardino-Ontario, CA    | 65         | 0             | Riverside County        | 69700                       | 7550                         | 9             | 626462            | 11                     | 12                      | 1                  |
| 6         | California | CA        | 40900   | Sacramento--Roseville--Arden-Arcade, CA | 61         | 0             | Placer County           | 43920                       | 4630                         | 9             | 375084            | 117                    | 12                      | 1                  |



| State FIP | State       | State abb | Area    | Area title                       | County FIP | Township code | County or township name | Number of home health aides | Number of nursing assistants | Census region | Over 65 populatio | Home health aide ratio | Nursing assistant ratio | Metropolit an area |
|-----------|-------------|-----------|---------|----------------------------------|------------|---------------|-------------------------|-----------------------------|------------------------------|---------------|-------------------|------------------------|-------------------------|--------------------|
| 41        | Oregon      | OR        | 41420   | Salem, OR                        | 47         | 0             | Marion County           | 4710                        | 1210                         | 9             | 72200             | 65                     | 17                      | 1                  |
| 72        | Puerto Rico | PR        | 32420   | Mayagüez, PR                     | 67         | 0             | Hormigueros Municipio   | 280                         |                              |               | 22213             | 13                     |                         | 1                  |
| 72        | Puerto Rico | PR        | 41980   | San Juan-Carolina-Caguas, PR     | 95         | 0             | Maunabo                 | 5160                        | 340                          |               | 423949            | 12                     | 1                       | 1                  |
| 72        | Puerto Rico | PR        | 11640   | Arecibo, PR                      | 65         | 0             | Hatillo Municipio       | 340                         | 40                           |               | 37835             | 9                      | 1                       | 1                  |
| 72        | Puerto Rico | PR        | 38660   | Ponce, PR                        | 149        | 0             | Villalba Municipio      | 400                         | 40                           |               | 61169             | 7                      | 1                       | 1                  |
| 72        | Puerto Rico | PR        | 25020   | Guayama, PR                      | 15         | 0             | Arroyo                  | 50                          |                              |               | 14824             | 3                      |                         | 1                  |
| 72        | Puerto Rico | PR        | 10380   | Aguadilla-Isabela, PR            | 131        | 0             | San Sebastian           | 430                         | 50                           |               | 62608             | 7                      | 1                       | 1                  |
|           |             |           | 7800001 | Virgin Islands                   |            |               |                         | 100                         | 130                          |               | 0                 |                        |                         | 0                  |
| 72        | Puerto Rico | PR        | 41900   | San German, PR                   | 23         | 0             | Cabo Rojo Municipio     | 230                         |                              |               | 29652             | 8                      |                         | 1                  |
| 72        | Puerto Rico | PR        | 7200006 | Puerto Rico nonmetropolitan area | 123        | 0             | Salinas                 | 180                         | 30                           |               | 27406             | 7                      | 1                       | 0                  |
|           |             |           | 6600001 | Guam                             |            |               |                         |                             | 330                          |               | 0                 |                        |                         | 0                  |
